# The neural architecture of language: Integrative modeling converges on predictive processing

Martin Schrimpf<sup>1,2,3</sup>, Idan Blank<sup>\*,1,4</sup>, Greta Tuckute<sup>\*,1,2</sup>, Carina Kauf<sup>\*,1,2</sup>, Eghbal A. Hosseini<sup>1,2</sup>,  
Nancy Kanwisher<sup>1,2,3</sup>, Joshua Tenenbaum<sup>†,1,3</sup>, Evelina Fedorenko<sup>†,1,2</sup>

<sup>1</sup> Department of Brain and Cognitive Sciences, MIT, Cambridge, MA, USA

<sup>2</sup> McGovern Institute for Brain Research, MIT, Cambridge, MA, USA

<sup>3</sup> Center for Brains, Minds and Machines, MIT, Cambridge, MA, USA

<sup>4</sup> Psychology Department, UCLA, Los Angeles, CA, USA

1

## 2 Significance

3 Language is a quintessentially human ability. Research has long probed the functional architecture of language processing in  
4 the mind and brain using diverse brain imaging, behavioral, and computational modeling approaches. However, adequate  
5 neurally mechanistic accounts of how meaning might be extracted from language are sorely lacking. Here, we report an  
6 important first step toward addressing this gap by connecting recent artificial neural networks from machine learning to  
7 human recordings during language processing. We find that the most powerful models predict neural and behavioral  
8 responses across different datasets up to noise levels. Models that perform better at predicting the next word in a sequence  
9 also better predict brain measurements – providing computationally explicit evidence that predictive processing  
10 fundamentally shapes the language comprehension mechanisms in the human brain.

11

12

## 13 Abstract

14 The neuroscience of perception has recently been revolutionized with an integrative modeling approach in which computation,  
15 brain function, and behavior are linked across many datasets and many computational models. By revealing trends across models,  
16 this approach yields novel insights into cognitive and neural mechanisms in the target domain. We here present a first systematic  
17 study taking this approach to higher-level cognition: human language processing, our species' signature cognitive skill. We find  
18 that the most powerful 'transformer' models predict nearly 100% of explainable variance in neural responses to sentences and  
19 generalize across different datasets and imaging modalities (fMRI, ECoG). Models' neural fits ('brain score') and fits to behavioral  
20 responses are both strongly correlated with model accuracy on the next-word prediction task (but not other language tasks).  
21 Model architecture appears to substantially contribute to neural fit. These results provide computationally explicit evidence that  
22 predictive processing fundamentally shapes the language comprehension mechanisms in the human brain.

23 computational neuroscience, language comprehension, fMRI, ECoG, natural language processing, artificial neural networks, deep learning

24 Correspondence: [mshch@mit.edu](mailto:mshch@mit.edu), [evelina9@mit.edu](mailto:evelina9@mit.edu)

25 <sup>\*,†</sup> joint second/senior authors

26 Code, data, models are available via [www.github.com/mshchimpf/neural-nlp](https://www.github.com/mshchimpf/neural-nlp)

27

28

29 A core goal of neuroscience is to decipher from patterns of neural activity the algorithms underlying our abilities to  
30 perceive, think, and act. Recently, a new “reverse engineering” approach to computational modeling in systems  
31 neuroscience has transformed our algorithmic understanding of the primate ventral visual stream (Bao et al., 2020; Cadena  
32 et al., 2019; Cichy et al., 2016; Kietzmann et al., 2019; Kubilius et al., 2019; Schrimpf et al., 2018, 2020; Yamins et al., 2014),  
33 and holds great promise for other aspects of brain function. This approach has been enabled by a breakthrough in artificial  
34 intelligence (AI): the engineering of artificial neural network (ANN) systems that perform core perceptual tasks with  
35 unprecedented accuracy, approaching human levels, and that do so using computational machinery that is abstractly similar  
36 to biological neurons. In the ventral visual stream, the key AI developments come from deep convolutional neural networks  
37 (DCNNs) that perform visual object recognition from natural images (Cireşan et al., 2012; Krizhevsky et al., 2012; Schrimpf et  
38 al., 2018, 2020; Yamins et al., 2014), widely thought to be the primary function of this pathway. Leading DCNNs for object  
39 recognition have now been shown to predict the responses of neural populations in multiple stages of the ventral stream  
40 (V1, V2, V4, IT), in both macaque and human brains, approaching the noise ceiling of the data. Thus, despite abstracting  
41 away aspects of biology, DCNNs provide the basis for a first complete hypothesis of how the brain extracts object percepts  
42 from visual input.

43  
44 Inspired by this success story, analogous ANN models have now been applied to other domains of perception (Kell et al.,  
45 2018; Zhuang et al., 2017). Could these models also let us reverse-engineer the brain mechanisms of higher-level human  
46 cognition? Here we show for the first time how the modeling approach pioneered in the ventral stream can be applied to a  
47 higher-level cognitive domain that plays an essential role in human life: language comprehension, or the extraction of  
48 meaning from spoken, written or signed words and sentences. Cognitive scientists have long treated neural network models  
49 of language processing with skepticism (Marcus, 2018; Pinker & Prince, 1988) given that these systems lack (and often  
50 deliberately attempt to do without) explicit symbolic representation – traditionally seen as a core feature of linguistic  
51 meaning. Recent ANN models of language, however, have proven capable of at least approximating some aspects of  
52 symbolic computation, and have achieved remarkable success on a wide range of applied natural language processing (NLP)  
53 tasks. The results presented here, based on this new generation of ANNs, suggest that a computationally adequate model of  
54 language processing in the brain may be closer than previously thought.

55  
56 Because we build on the same logic in our analysis of language in the brain, it is helpful to review why the neural network-  
57 based integrative modeling approach has proven so powerful in the study of object recognition in the ventral stream.  
58 Crucially, our ability to robustly link computation, brain function, and behavior is supported not by testing a single model on  
59 a single dataset or a single kind of data, but by large-scale *integrative benchmarking* (Schrimpf et al., 2020) that establishes  
60 consistent patterns of performance across many different ANNs applied to multiple neural and behavioral datasets,  
61 together with their performance on the proposed core computational function of the brain system under study. Given the  
62 complexities of the brain’s structure and the functions it performs, any one of these models is surely oversimplified and  
63 ultimately wrong – at best, an approximation of some aspects of what the brain does. But some models are less wrong than  
64 others, and consistent *trends in performance across models* can reveal not just which model best fits the brain, but which  
65 properties of a model underlie its fit to the brain, thus yielding critical insights that transcend what any single model can tell  
66 us.

## Language Stimuli

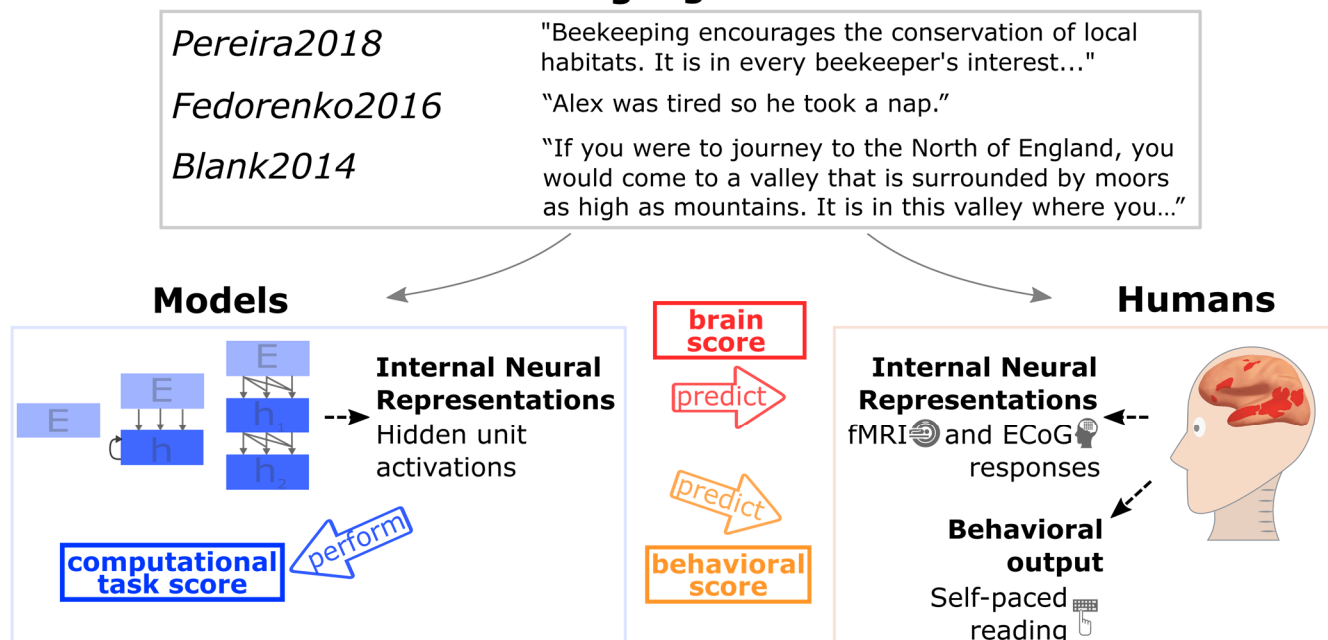

Figure 1: **Comparing Artificial Neural Network models of language processing to human language processing.** We tested how well different models predict measurements of human neural activity (fMRI and ECoG) and behavior (reading times) during language comprehension. The candidate models ranged from simple embedding models to more complex recurrent and transformer networks. Stimuli ranged from sentences to passages to stories and were 1) fed into the models, and 2) presented to human participants (visually or auditorily). Models' internal representations were evaluated on three major dimensions: their ability to predict human neural representations (brain score, extracted from within the fronto-temporal language network (e.g., Fedorenko et al., 2010); the network topography is schematically illustrated in red on the template brain above); their ability to predict human behavior in the form of reading times (behavioral score); and their ability to perform computational tasks such as next-word prediction (computational task score). Consistent relationships between these measures across many different models reveal insights beyond what a single model can tell us.

67 In the ventral stream specifically, our understanding that computations underlying object recognition are analogous to the  
 68 structure and function of DCNNs is supported by findings that across hundreds of model variants, DCNNs that perform better  
 69 on object recognition tasks also better capture human recognition behavior and neural responses in IT cortex of both human  
 70 and non-human primates (Rajalingham et al., 2018; Schrimpf et al., 2018, 2020; Yamins et al., 2014). This integrative  
 71 benchmarking reveals a rich pattern of correlations among three classes of performance measures — (i) neural variance  
 72 explained, in IT neurophysiology or fMRI responses (brain scores), (ii) accuracy in predicting hits and misses in human object  
 73 recognition behavior, or human object similarity judgments (behavioral scores), and (iii) accuracy on the core object  
 74 recognition task (computational task score) — such that for any individual DCNN model we can predict how well it would  
 75 score on each of these measures from the other measures. This pattern of results was not assembled in a single paper but in  
 76 multiple papers across several labs and several years. Taken together, they provide strong evidence that the ventral stream  
 77 supports primate object recognition through something like a deep convolutional feature hierarchy, the exact details of which  
 78 are being modeled with ever-increasing precision.

79 Here we describe an analogous pattern of results for ANN models of human language, establishing a link between language  
 80 models, including transformer-based ANN architectures that have revolutionized natural language processing in AI systems  
 81 over the last three years, and fundamental computations of human language processing as reflected in both neural and  
 82 behavioral measures. Language processing is known to depend causally on a left-lateralized fronto-temporal brain network  
 83 (Bates et al., 2003; Binder et al., 1997; Fedorenko & Thompson-Schill, 2014; Friederici, 2012; Gorno-Tempini et al., 2004;  
 84 Hagoort, 2019; Price, 2010) (Fig. 1) that responds robustly and selectively to linguistic input (Fedorenko et al., 2011; Monti et  
 85 al., 2012), whether auditory or visual (Deniz et al., 2019; Regev et al., 2013). Yet the precise computations underlying language  
 86 processing in the brain remain unknown. Computational models of sentence processing have previously been used to explain  
 87 both behavioral (Dotlačil, 2018; Futrell, Gibson, & Levy, 2020; Gibson, 1998; Gibson et al., 2013; Hale, 2001; Jurafsky, 1996;

88 Lakretz et al., 2020; Levy, 2008a, 2008b; Lewis et al., 2006; McDonald & Macwhinney, 1998; Smith & Levy, 2013; Spivey-  
89 Knowlton, 1996; Steedman, 2000; van Schijndel et al., 2013), and neural responses to linguistic input (Brennan et al., 2016;  
90 Brennan & Pyllkänen, 2017; Ding et al., 2015; Frank et al., 2015; Henderson et al., 2016; Huth et al., 2016; Lopopolo et al.,  
91 2017; Lyu et al., 2019; T. M. Mitchell et al., 2008; Nelson et al., 2017; Pallier et al., 2011; Pereira et al., 2018; Rabovsky et al.,  
92 2018; Shain et al., 2020; Wehbe et al., 2014; Willems et al., 2016; Gauthier & Ivanova, 2018; Gauthier & Levy, 2019; Hu et al.,  
93 2020; Jain & Huth, 2018; S. Wang et al., 2020; Schwartz et al., 2019; Toneva & Wehbe, 2019). However, none of the prior  
94 studies have attempted large-scale integrative benchmarking that has proven so valuable in understanding key brain-  
95 behavior-computation relationships in the ventral stream; instead, they have typically tested one or a small number of models  
96 against a single dataset, and the same models have not been evaluated on all three metrics of neural, behavioral, and  
97 objective task performance. Previously tested models have also left much of the variance in human neural/behavioral data  
98 unexplained. Finally, until the rise of recent ANNs (e.g., transformer architectures), language models did not have sufficient  
99 capacity to solve the full linguistic problem that the brain solves – to form a representation of sentence meaning capable of  
100 performing a broad range of real-world language tasks on diverse natural linguistic input. We are thus left with a collection  
101 of suggestive results but no clear sense of how close ANN models are to fully explaining language processing in the brain, or  
102 what model features are key in enabling models to explain neural and behavioral data.

103 Our goal here is to present a first systematic integrative modeling study of language in the brain, at the scale necessary to  
104 discover robust relationships between neural and behavioral measurements from humans, and performance of models on  
105 language tasks. We seek to determine not just which model fits empirical data best, but what dimensions of variation across  
106 models are correlated with fit to human data. This approach has not been applied in the study of language or any other higher  
107 cognitive system, and even in perception has not been attempted within a single integrated study. Thus, we view our work  
108 more generally as a *template for how to apply the integrative benchmarking approach to any perceptual or cognitive system*.

109 Specifically, we examined the relationships between 43 diverse state-of-the-art ANN language models (henceforth ‘models’)  
110 across three neural language comprehension datasets (two fMRI, one electrocorticography (ECoG)), as well as behavioral  
111 signatures of human language processing in the form of self-paced reading times, and a range of linguistic functions assessed  
112 via standard engineering tasks from NLP. The models spanned all major classes of existing ANN language approaches and  
113 included simple embedding models (e.g., GloVe (Pennington et al., 2014)), more complex recurrent neural networks (e.g.,  
114 LM1B (Jozefowicz et al., 2016)), and many variants of transformers or attention-based architectures—including both  
115 ‘unidirectional-attention’ models (trained to predict the next word given the previous words; e.g., GPT (Radford et al., 2019))  
116 and ‘bidirectional-attention’ models (trained to predict a missing word given the surrounding context; e.g., BERT (Devlin et  
117 al., 2018)).

118 Our integrative approach yielded four major findings. (1) Models’ relative fit to neural data (neural predictivity or “brain  
119 score”)—estimated on held-out test data—generalizes across different datasets and imaging modality (fMRI, ECoG), and  
120 certain architectural features consistently lead to more brain-like models: transformer-based models perform better than  
121 recurrent networks or word-level embedding models, and larger-capacity models perform better than smaller models. (2)  
122 The best models explain nearly 100% of the explainable variance (up to the noise ceiling) in neural responses to sentences.  
123 This result stands in stark contrast to earlier generations of models that have typically accounted for at most 30-50% of the  
124 predictable neural signal. (3) Across models, significant correlations hold among all three metrics of model performance: brain  
125 scores (fit to fMRI and ECoG data), behavioral scores (fit to reading time), and model accuracy on the next-word prediction  
126 task. Importantly, no other linguistic task was predictive of models’ fit to neural or behavioral data. These findings provide  
127 strong evidence for a classic hypothesis about the computations underlying human language understanding, that the brain’s  
128 language system is optimized for predictive processing in the service of meaning extraction. (4) Intriguingly, the scores of  
129 models initialized with random weights (prior to training, but with a trained linear readout) are well above chance and  
130 correlate with trained model scores, which suggests that network architecture is an important contributor to a model’s brain  
131 score. In particular, one architecture introduced just in 2019, the generative pre-trained transformer (GPT-2), consistently  
132 outperforms all other models and explains almost all variance in both fMRI and ECoG data from sentence processing tasks.  
133 GPT-2 is also arguably the most cognitively plausible of the transformer models (because it uses unidirectional, forward  
134 attention), and performs best overall as an AI system when considering both natural language understanding and natural  
135 language generation tasks. Thus, even though the goal of contemporary AI is to improve model performance and not

136 necessarily to build models of brain processing, this endeavor appears to be rapidly converging on architectures that might  
137 capture key aspects of language processing in the human mind and brain.

138

## 139 **Results**

140 We evaluated a broad range of state-of-the-art ANN language models on the match of their internal representations to three  
141 human neural datasets. The models spanned all major classes of existing language models ([Methods 5](#), Table S11). The  
142 neural datasets consisted of i) fMRI activations while participants read short passages, presented one sentence at a time  
143 (across two experiments) that spanned diverse topics (*Pereira2018* dataset (Pereira et al., 2018)); ii) ECoG recordings while  
144 participants read semantically and syntactically diverse sentences, presented one word at a time (*Fedorenko2016* dataset  
145 (Fedorenko et al., 2016)); and iii) fMRI BOLD signal time-series elicited while participants listened to ~5-minutes-long  
146 naturalistic stories (*Blank2014* dataset (Blank et al., 2014)) ([Methods 1-3](#)). Thus, the datasets varied in the imaging modality  
147 (fMRI/ECoG), the nature of the materials (unconnected sentences/passages/stories), the grain of linguistic units to which  
148 responses were recorded (sentences/words/2s-long story fragments), and presentation modality (reading/listening). In most  
149 analyses, we consider the overall results across the three neural datasets; when considering the results for the individual  
150 neural datasets, we give the most weight to *Pereira2018* because it includes multiple repetitions per stimulus (sentence)  
151 within each participant and quantitatively exhibits the highest internal reliability (Fig. S1). Because our research questions  
152 concern language processing, we extracted neural responses from language-selective voxels or electrodes that were  
153 functionally identified by an extensively validated independent 'localizer' task that contrasts reading sentences versus  
154 nonword sequences (Fedorenko et al., 2010). This localizer robustly identifies the fronto-temporal language-selective  
155 network ([Methods 1-3](#)).

156 To compare a given model to a given dataset, we presented the same stimuli to the model that were presented to humans  
157 in neural recording experiments and 'recorded' the model's internal activations ([Methods 5-6](#), Fig. 1). We then tested how  
158 well the model recordings could predict the neural recordings for the same stimuli, using a method originally developed for  
159 studying visual object recognition (Schrimpf et al., 2018; Yamins et al., 2014). Specifically, using a subset of the stimuli, we  
160 fit a linear regression from the model activations to the corresponding human measurements, modeling the response of  
161 each voxel (*Pereira2018*) / electrode (*Fedorenko2016*) / brain region (*Blank2014*) as a linear weighted sum of responses of  
162 different units from the model. We then computed model predictions by applying the learned regression weights to model  
163 activations for the held-out stimuli, and evaluated how well those predictions matched the corresponding held-out human  
164 measurements by computing Pearson's correlation coefficient. We further normalized these correlations by the extrapolated  
165 reliability of the particular dataset, which places an upper bound ('ceiling') on the correlation between the neural  
166 measurements and any external predictor ([Methods 7](#), Fig. S1). The final measure of a model's performance ('score') on a  
167 dataset is thus Pearson's correlation between model predictions and neural recordings divided by the estimated ceiling and  
168 averaged across voxels/electrodes/regions and participants. We report the score for the best-performing layer of each model  
169 ([Methods 6](#), Fig. S12) but controlled for the generality of the layer choice in a train/test split (Fig. S2b, c).

170 **Specific models accurately predict human brain activity.** We found (Fig. 2a-b) that specific models predict *Pereira2018* and  
171 *Fedorenko2016* datasets with up to 100% predictivity relative to the noise ceiling ([Methods 7](#), Fig. S1). These scores  
172 generalize to another metric, "RDM", based on representational similarity without any fitting (Fig. S2a). The *Blank2014*



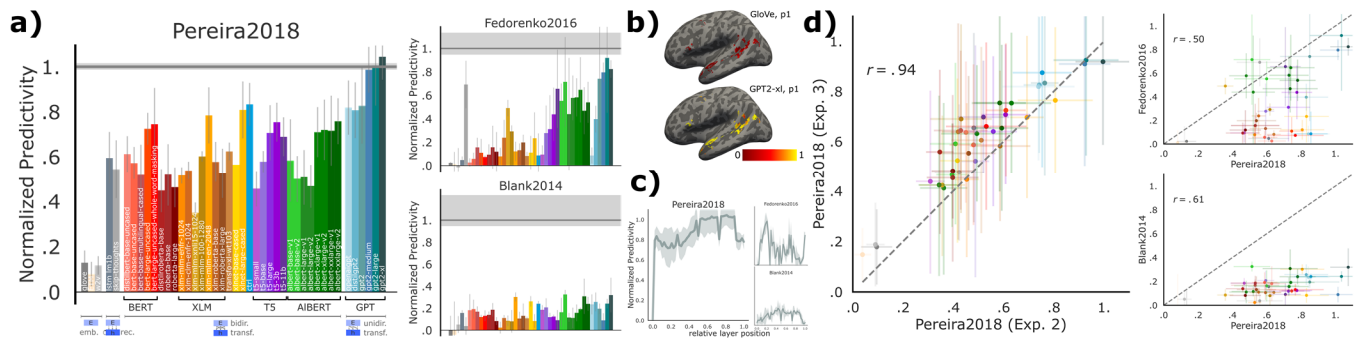

**Figure 2: Specific models accurately predict neural responses consistently across datasets.** (a) We compared 43 computational models of language processing (ranging from embedding to recurrent and bi- and uni-directional transformer models) in their ability to predict human brain data. The neural datasets include: fMRI voxel responses to visually presented (sentence-by-sentence) passages (*Pereira2018*), ECoG electrode responses to visually presented (word-by-word) sentences (*Fedorenko2016*), fMRI region of interest (ROI) responses to auditorily presented ~5min-long stories (*Blank2014*). For each model, we plot the normalized predictivity ('brain score'), i.e. the fraction of ceiling (gray line; [Methods 7](#), Fig. S1) that the model can predict. Ceiling levels are .32 (*Pereira2018*), .17 (*Fedorenko2016*), and .20 (*Blank2014*). Model classes are grouped by color ([Methods 5](#), Table S10). Error bars (here and elsewhere) represent median absolute deviation over subject scores. (b) Normalized predictivity of GloVe (a low-performing embedding model) and GPT2-xl (a high-performing transformer model) in the language-responsive voxels in the left hemisphere of two representative participants from *Pereira2018* (also Fig. S3). (c) Brain score per layer in GPT2-xl. Middle-to-late layers generally yield the highest scores for *Pereira2018* and *Blank2014* whereas earlier layers better predict *Fedorenko2016*. This difference might be due to predicting individual word representations (within a sentence) in *Fedorenko2016*, as opposed to whole-sentence representations in *Pereira2018*. (d) To test how well model brain scores generalize across datasets, we correlated i) two experiments with different stimuli (and some participant overlap) in *Pereira2018* (obtaining a very strong correlation), an ii) *Pereira2018* brain scores with the scores for each of *Fedorenko2016* and *Blank2014* (obtaining lower but still highly significant correlations). Brain scores thus tend to generalize across datasets, although differences between datasets exist which warrant the full suite of datasets.

173 dataset is also reliably predicted, but with lower predictivity. Models vary substantially in their ability to predict neural data.  
 174 Generally, embedding models such as GloVe do not perform well on any dataset. In contrast, recurrent networks such as skip-  
 175 thoughts, as well as transformers such as BERT, predict large portions of the data. The model that predicts the human data  
 176 best across datasets is GPT2-xl, a unidirectional-attention transformer model, which predicts *Pereira2018* and *Fedorenko2016*  
 177 at close to 100% of the noise ceiling and is among the highest-performing models on *Blank2014* with 32% normalized  
 178 predictivity. These scores are higher in the language network than other parts of the brain (SI-4). Intermediate layer  
 179 representations in the models are most predictive, significantly outperforming representations at the first and output layers  
 180 (Figs. 2c, S13).

181 **Model scores are consistent across experiments/datasets.** To test the generality of the model representations, we examined the  
 182 consistency of model brain scores across datasets. Indeed, if a model achieves a high brain score on one dataset, it tends to  
 183 also do well on other datasets (Fig. 2d), ruling out the possibility that we are picking up on spurious, dataset-idiosyncratic  
 184 predictivity, and suggesting that the models' internal representations are general enough to capture brain responses to  
 185 diverse linguistic materials presented visually or auditorily, and across three independent sets of participants. Specifically,  
 186 model brain scores across the two experiments in *Pereira2018* (overlapping sets of participants) correlate at  $r=.94$  (Pearson  
 187 here and elsewhere,  $p < .00001$ ), scores from *Pereira2018* and *Fedorenko2016* correlate at  $r=.50$  ( $p < .001$ ), and from  
 188 *Pereira2018* and *Blank2014* at  $r=.63$  ( $p < .0001$ ).

189  
 190 **Next-word-prediction task performance selectively predicts brain scores.** In the critical test of which computations might  
 191 underlie human language understanding, we examined the relationship between the models' ability to predict an upcoming  
 192 word and their brain scores. Words from the Wikitext-2 dataset (Merity et al., 2016) were sequentially fed into the candidate  
 193 models. We then fit a linear classifier (over words in the vocabulary;  $n=50k$ ) from the last layer's feature representation  
 194 (frozen, i.e. no finetuning) on the training set to predict the next word, and evaluated performance on the held-out test set  
 195 ([Methods 8](#)). Indeed, next-word-prediction task performance robustly predicts brain scores (Fig. 3a;  $r=.44$ ,  $p < .01$ , averaged  
 196 across datasets). The best language model, GPT2-xl, also achieves the highest brain score (see previous section). This  
 197 relationship holds for model variants within each model class—embedding models, recurrent networks, and transformers—  
 198 ruling out the possibility that this correlation is due to between-class differences in next-word-prediction performance.

199 To test whether next-word prediction is special in this respect, we asked whether model performance on *any* language task  
 200 correlates with brain scores. As with next-word prediction, we kept the model weights fixed and only trained a linear readout.  
 201 We found that performance on tasks from the GLUE benchmark collection (Cer et al., 2018; Dolan & Brockett, 2005; Levesque  
 202 et al., 2012; Rajpurkar et al., 2016; Socher et al., 2013; A. Wang, Singh, et al., 2019; Warstadt et al., 2019; Williams et al.,

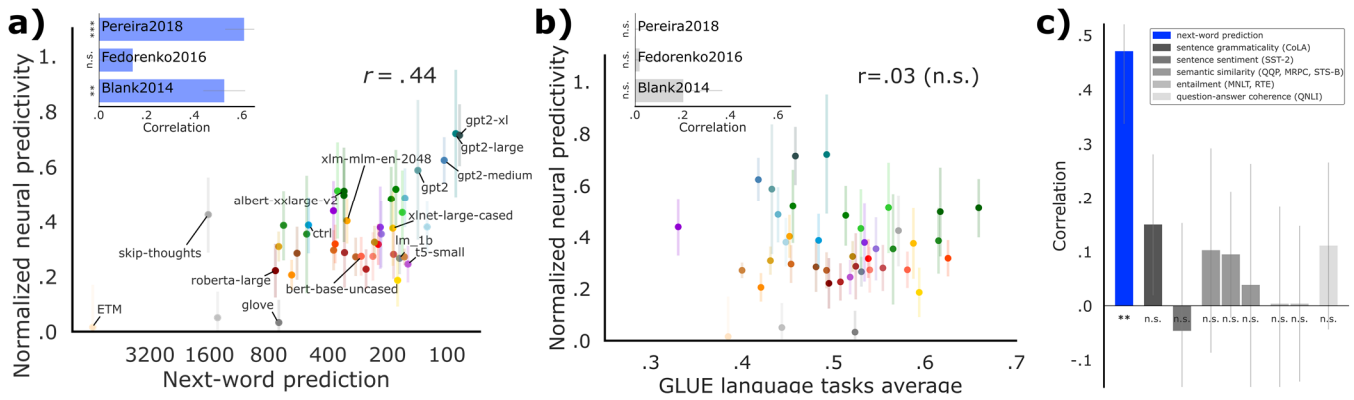

**Figure 3: Model performance on a next-word-prediction task selectively predicts brain scores.** (a) Next-word-prediction task performance was evaluated as the surprisal between the predicted and true next word in the WikiText-2 dataset of 720 Wikipedia articles, or *perplexity* (x-axis, lower is better; training only a linear readout leading to worse perplexity values than canonical fine-tuning, see [Methods-8](#)). Next-word-prediction task scores strongly predict brain scores across datasets (inset: this correlation is significant for two individual datasets: *Pereira2018* and *Blank2014*; the correlation for *Fedorenko2016* is positive but not significant). (b) Performance on diverse language tasks from the GLUE benchmark collection does *not* correlate with overall or individual-dataset brain scores (inset; SI-5; training only a linear readout). (c) Correlations of individual tasks with brain scores. Only improvements on next-word prediction lead to improved neural predictivity.

203 2018)—including grammaticality judgments, sentence similarity judgments, and entailment—does *not* predict brain scores  
 204 (Fig. 3b-c). The difference in the strength of correlation between brain scores and the next-word prediction task performance  
 205 vs. the GLUE tasks performance is highly reliable ( $p < 0.00001$ , t-test over 1,000 bootstraps of scores and corresponding  
 206 correlations; [Methods\\_9](#)). This result suggests that optimizing for predictive representations may be a critical shared objective  
 207 of biological and artificial neural networks for language, and perhaps more generally (Keller and Mrcic-Flogel, 2018; Singer et  
 208 al., 2018).

210 **Brain scores and next-word-prediction task performance correlate with behavioral scores.** Beyond internal neural  
 211 representations, we tested the models' ability to predict external behavioral outputs because, ultimately, in integrative  
 212 benchmarking, we strive for a computationally precise account of language processing that can explain both neural response  
 213 patterns and observable linguistic behaviors. We chose a large corpus ( $n=180$  participants) of self-paced reading times for  
 214 naturalistic story materials (*Futrell2018* dataset (Futrell, Gibson, Tily, et al., 2020)). Per-word reading times provide a theory-  
 215 neutral measure of incremental comprehension difficulty, which has long been a cornerstone of psycholinguistic research in  
 216 testing theories of sentence comprehension (Demberg & Keller, 2008; Gibson, 1998; Just & Carpenter, 1980; D. C. Mitchell,  
 217 1984; Rayner, 1978; Smith & Levy, 2013) and which were recently shown to robustly predict neural activity in the language  
 218 network (Wehbe et al., 2020).

219 **Specific models accurately predict reading times.** We regressed each model's last layer's feature representation (i.e., closest to the  
 220 output) against reading times and evaluated predictivity on held-out words. As with the neural datasets, we observed a

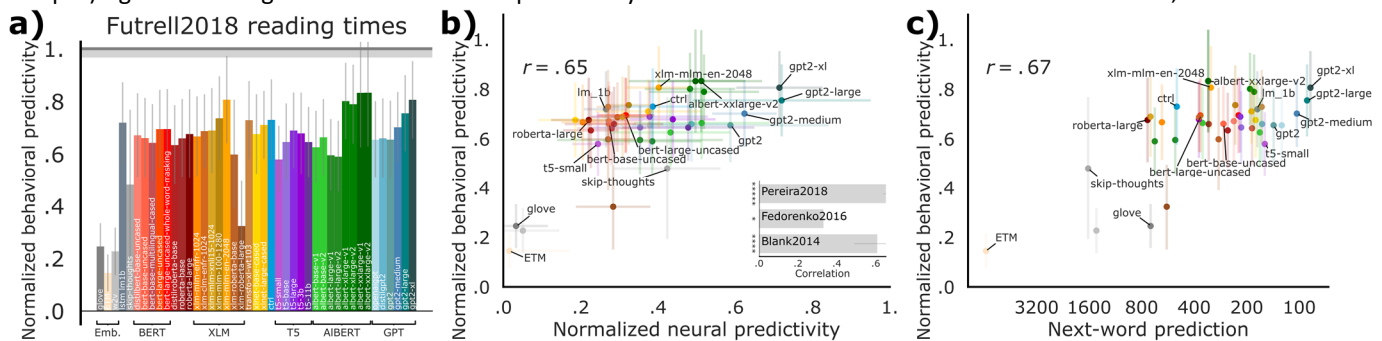

**Figure 4: Behavioral scores, brain scores, and next-word-prediction task performance are pairwise correlated.** (a) Behavioral predictivity of each model on *Futrell2018* reading times (notation similar to Fig. 2). Ceiling level is .76. (b) Models' neural scores aggregated across the three neural datasets (or for each dataset individually; inset and Fig. S6) correlates with behavioral scores. (c) Next-word-prediction task performance (Fig. 3) correlates with behavioral scores. Performance on other language tasks (from the GLUE benchmark collection) does *not* correlate with behavioral scores (Fig. S7).

221 spread of model ability to capture human behavioral data, with models such as GPT2-xl and ALBERT-xxlarge predicting these  
222 data close to the noise ceiling (Fig. 4a; also Merx & Frank, 2020; Wilcox et al., 2020).

223 **Brain scores correlate with behavioral scores.** To test whether models with the highest brain scores also predict reading times  
224 best, we compared models' neural predictivity (across datasets) with those same models' behavioral predictivity. Indeed,  
225 we observed a strong correlation (Fig. 4b;  $r=.65$ ,  $p<<.0001$ ), which also holds for the individual neural datasets (inset and  
226 Fig. S6). These results suggest that further improving models' neural predictivity will simultaneously improve their  
227 behavioral predictivity.

228 **Next-word-prediction task performance correlates with behavioral scores.** Next-word-prediction task performance is predictive of  
229 reading times (Fig. 4c;  $r=.67$ ,  $p<<.0001$ ), in line with earlier studies (Goodkind & Bicknell, 2018; van Schijndel & Linzen, 2018)  
230 and thus connecting all three measures of performance: brain scores, behavioral scores, and task performance on next-word  
231 prediction.

232  
233 **Model architecture contributes to model-to-brain relationship.** The brain's language network plausibly arises through a  
234 combination of evolutionary and learning-based optimization. In a first attempt to test the relative importance of the models'  
235 intrinsic architectural properties vs. training-related features, we performed two analyses. First, we found that architectural  
236 features (e.g. number of layers) but neither of the features related to training (e.g. dataset and vocabulary size) significantly  
237 predicted improvements in model performance on the neural data (S10, Table S11). These results align with prior studies that  
238 had reported that architectural differences affect model performance on normative tasks like next-word prediction after  
239 training, and define the representational space that the model can learn (Arora et al., 2018; Fukushima, 1988; Geiger et al.,  
240 2020). Second, we computed brain scores for the 43 models without training, i.e. with initial (random) weights. Note that the  
241 predictivity metric still trains a linear readout on top of the model representations. Surprisingly, even with no training, several  
242 models achieved reasonable scores (Fig. 5), consistent with recent results of models in high-level visual cortex (Geiger et al.,  
243 2020) as well as findings on the power of random initializations in natural language processing (Merchant et al., 2020; Tenney  
244 et al., 2019; Zhang & Bowman, 2018). For example, across the three datasets, untrained GPT2-xl achieves an average  
245 predictivity of  $\sim 51\%$ , only  $\sim 20\%$  lower than the trained network. A similar trend is observed across models: training generally  
246 improves brain scores, on average by 53%. Across models, the untrained scores are strongly predictive of the trained scores  
247 ( $r=.74$ ,  $p<<.00001$ ), indicating that models that already perform well with random weights improve further with training.

248 To ensure the robustness and generalizability of the results for untrained models, and to gain further insights into these  
249 results, we performed four additional analyses (Fig. S9). First, we tested a random context-independent embedding with  
250 equal dimensionality to the GPT2-xl model but no architectural priors and found that it predicts only a small fraction of the  
251 neural data, on average below 15%, suggesting that a large feature space alone is not sufficient (Fig. S9a). Second, to ensure

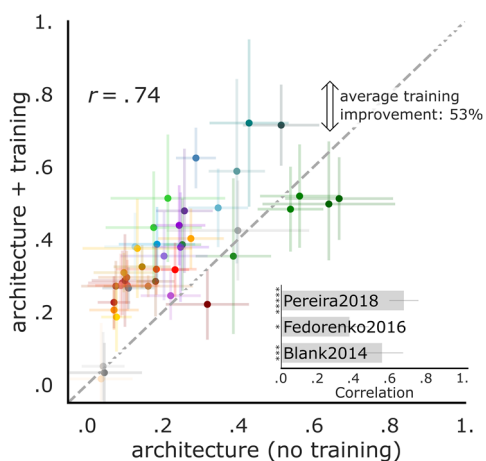

Figure 5: **Model architecture contributes to the model-brain relationship.**

We evaluate untrained models by keeping weights at their initial random values. The remaining representations are driven by architecture alone and are tested on the neural datasets (Fig. 2). Across the three datasets, architecture alone yields representations that predict human brain activity considerably well. On average, training improves model scores by 53%. For *Pereira2018*, training improves predictivity the most whereas for *Fedorenko2016* and *Blank2014*, training does not always change—and for some models even decreases—neural scores (Fig. S8). The untrained model performance is consistently predictive of its performance after training across and within (inset) datasets.



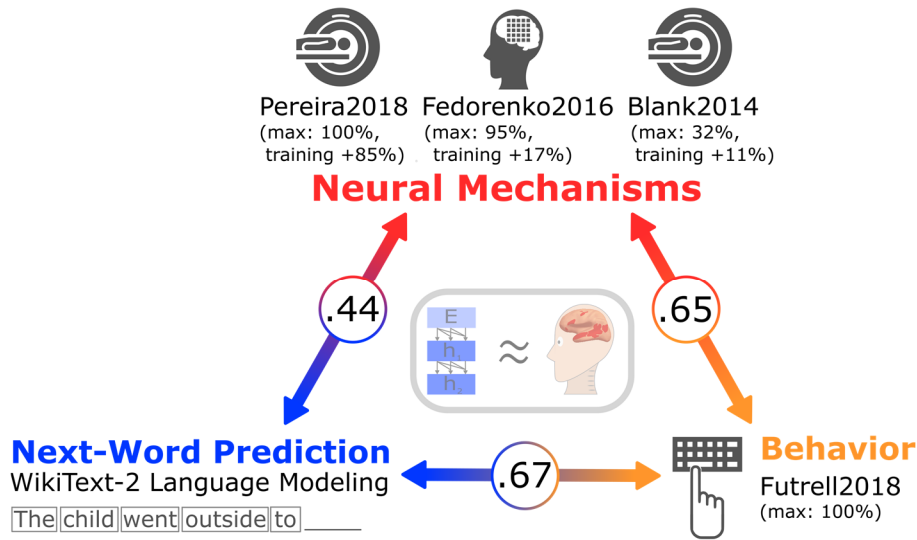

Figure 6 (Overview of results): **Connecting neural mechanisms, behavior, and computational task (next-word prediction)**. Specific ANN language models are beginning to approximate the brain's mechanisms for processing language (middle gray box). For the neural datasets (fMRI and ECoG recordings; top, red), and for the behavioral dataset (self-paced reading times; bottom right, orange), we report i) the value for the model achieving the highest predictivity, and ii) the average improvement on brain scores across models after training. Model performances on the next-word-prediction task (WikiText-2 language modeling perplexity; bottom left, blue) predict brain and behavioral scores; and brain scores predict behavioral scores (circled numbers).

252 that the overlap between the linguistic materials (words, bigrams, etc.) used in the train and test splits is not driving the  
 253 results, we quantified the overlap and found it to be low, especially for bi- and tri-grams (Fig. S9b). Third, to ensure that the  
 254 linear regression used in the predictivity metric did not artificially inflate the scores of untrained models, we used an  
 255 alternative metric – “RDM” – that does not involve any fitting. Scores of untrained models on the predictivity metric  
 256 generalized to scores on the RDM metric (Fig. S9d). Finally, we examined the performance of untrained models with a trained  
 257 linear readout on the next-word prediction task and found similar performance trends to those we observed for the neural  
 258 scores (Fig. S9c), confirming the representational power of untrained representations.  
 259

260  
 261

## 262 Discussion

### 263 Summary of key results and their implications.

264 Our results, summarized in Fig. 6, show that specific ANN language models can predict human neural and behavioral  
 265 responses to linguistic input with high accuracy: the best models achieve, on some datasets, perfect predictivity relative to  
 266 the noise ceiling. Model scores correlate across neural and behavioral datasets spanning recording modalities (fMRI, ECoG,  
 267 reading times) and diverse materials presented visually and auditorily across three sets of participants, establishing the  
 268 robustness and generality of these findings. Critically, both neural and behavioral scores correlate with model performance  
 269 on the normative next-word prediction task – but not other language tasks. Finally, untrained models with random weights  
 270 (and a trained linear readout) produce representations beginning to approximate those in the brain's language network.  
 271

272 **Predictive language processing.** Underlying the integrative modeling framework, implemented here in the cognitive domain of  
 273 language, is the idea that large-scale neural networks can serve as hypotheses of the actual computations conducted in the  
 274 brain. We here identified some models—unidirectional-attention transformer architectures—that accurately capture brain  
 275 activity during language processing. We then began dissecting variations across the range of model candidates to explain *why*  
 276 they achieve high brain scores. Two core findings emerged, both supporting the idea that the human language system is  
 277 optimized for predictive processing. First, we found that the models' performance on the next-word prediction task, but not  
 278 other language tasks, is correlated with neural predictivity (see (Gauthier & Levy, 2019) for related evidence of fine-tuning of  
 279 one model on tasks other than next-word-prediction leading to worse model-to-brain fit). Recent preprints conceptually  
 280 replicate and extend this basic finding (Caucheteux & King, 2020; Goldstein et al., 2020; Wehbe et al., 2020; Wilcox et al.,  
 281 2020). Language modeling (predicting the next word) is the task of choice in the natural language processing (NLP) community:  
 282 it is simple, unsupervised, scalable, and appears to produce the most generally useful, successful language representations.  
 283 This is likely because language modeling encourages a neural network to build a joint probability model of the linguistic signal,  
 284 which implicitly requires sensitivity to diverse kinds of regularities in the signal.

285

286 Second, we found that the models that best match human language processing are precisely those that are trained to predict  
287 the next word. Predictive processing has advanced to the forefront of theorizing in cognitive science (Christiansen & Chater,  
288 1999; Clark, 2013; Elman, 1990, 1991, 1993; McRae et al., 1998; Rohde & Plaut, 1999; Spivey & Tanenhaus, 1998; Tenenbaum  
289 et al., 2011) and neuroscience (Bastos et al., 2012; Keller & Mrcsic-Flogel, 2018; Mumford, 1992; Rao & Ballard, 1999;  
290 Srinivasan et al., 1982), including in the domain of language (Kuperberg & Jaeger, 2016; Levy, 2008a). The rich sources of  
291 information that comprehenders combine to interpret language—including lexical and syntactic information, world  
292 knowledge, and information about others' mental states (Garnsey et al., 1997; MacDonald et al., 1994; Tanenhaus et al.,  
293 1995; Trueswell et al., 1993, 1994)—can be used to make informed guesses about how the linguistic signal may unfold, and  
294 much behavioral and neural evidence now suggests that readers and listeners indeed engage in such predictive behavior  
295 (Altmann & Kamide, 1999; Frank & Bod, 2011; Kuperberg & Jaeger, 2016; Shain et al., 2020; Smith & Levy, 2013). An intriguing  
296 possibility is therefore that both the human language system and successful ANN models of language are optimized to predict  
297 upcoming words in the service of efficient meaning extraction.

298

299 Going beyond the broad *idea* of prediction in language, the work presented here validates, refines, and computationally  
300 implements an explicit account of predictive processing: for the first time in the neuroscience of language, we were able to  
301 accurately predict (relative to the noise ceiling) activity across voxels as well as neuronal populations in human cortex during  
302 the processing of sentences. We quantitatively test the predictive processing hypothesis at the level of voxel/electrode/fROI  
303 responses and, through the use of end-to-end models, related neural mechanisms to performance of models on  
304 computational tasks. Moreover, we were able to reject multiple alternative hypotheses about the objective of the language  
305 system: model performance on diverse benchmarks from the GLUE suite of benchmarks (A. Wang, Singh, et al., 2019),  
306 including judgments about syntactic and semantic properties of sentences, was not predictive of brain or behavioral scores.  
307 The best-performing computational models identified in this work serve as computational explanations for the entire  
308 language processing pipeline from word inputs to neural mechanisms to behavioral outputs. These best-performing models  
309 can now be further dissected, as well as tested on new diverse, linguistic inputs in future experiments, as discussed below.

310

311 **Importance of architecture.** We also found that architecture is an important contributor to the models' match to human brain  
312 data: untrained models with a trained linear readout performed well above chance in predicting neural activity, and this  
313 finding held under a series of controls to alleviate concerns that it could be an artifact of our training or testing methodologies  
314 (Fig. S9). This result is consistent with findings in models of early (Cadena et al., 2019; Cichy et al., 2016; Geiger et al., 2020)  
315 and high-level visual processing (Geiger et al., 2020) and speech perception (Millet & King, 2021), as well as recent results in  
316 natural language processing (Merchant et al., 2020; Tenney et al., 2019; Zhang & Bowman, 2018), but it raises important  
317 questions of interpretation in the context of human language. If we construe model training as analogous to learning in human  
318 development, then human cortex might already provide a sufficiently rich structure that allows for the relatively rapid  
319 acquisition of language (Carey & Bartlett, 1978; Dickinson, 1984; Heibeck & Markman, 1987). In that analogy, the human  
320 research community's development of new architectures such as the transformer networks that perform well in both NLP  
321 tasks and neural language modeling could be akin to recapitulating evolution (Hasson et al., 2020), or perhaps, more  
322 accurately, selective breeding with genetic modification: structural changes are tested and the best-performing ones are  
323 incorporated into the next generation of models. Importantly, this process still optimizes for language modeling, only  
324 implicitly and on a different timescale from biological and cultural evolutionary mechanisms conventionally studied in brain  
325 and language.

326

327 More explicitly, but speculatively, it is possible that transformer networks can work as brain models of language even without  
328 extensive training because the hierarchies of local spatial filtering and pooling as found in convolutional as well as attention-  
329 based networks are a generally applicable brain-like mechanism to extract abstract features from natural signals. Regardless  
330 of the exact filter weights, transformer architectures build on word embeddings that capture both semantic and syntactic  
331 features of words, and integrate contextually weighted predictions across scales such that contextual dependencies are  
332 captured at different scales in different kernels. The representations in such randomized architectures could thus reflect a  
333 kind of multi-scale, spatially smoothed average (over consecutive inputs) of word embeddings, which might capture the  
334 statistical gist-like processing of language observed in both behavioral studies (Ferreira et al., 2002; Gibson et al., 2013; Levy,  
335 2008b) and human neuroimaging (Mollica et al., 2020). The weight sharing within architectural sub-layers ("multi-head

336 attention”) introduced by combinations of query-key-value pairs in transformers might provide additional consistency and  
337 coverage of representations. Relatedly, an idea during early work on perceptrons was to have random projections of input  
338 data into high-dimensional spaces and to then only train thin readouts on top of these projections. This was motivated by  
339 Cover’s theorem which states that non-linearly separable data can likely be linearly separated after projection into a high-  
340 dimensional space (Cover, 1965). These ideas have successfully been applied to kernel machines (Rahimi & Recht, 2009) and  
341 are more recently explored again with deep neural networks (Frankle et al., 2019); in short, it is possible that even random  
342 features with the right multiscale structure in time and space could be more powerful for representing human language than  
343 is currently understood. Finally, it is worth noting that the initial weights in the networks we study stem from weight initializer  
344 distributions that were chosen to provide solid starting points for contemporary architectures and lead to reasonable initial  
345 representations that model training further refines. These initial representations could thus include some important aspects  
346 of language structure already. A concrete test for these ideas would be the following: construct model variants that average  
347 over word embeddings at different scales and compare these models’ representations with those of different layers in  
348 untrained transformer architectures as well as the neural datasets. More detailed analyses, including minimal-pair model  
349 variant comparisons, will be needed to fully separate the representational contributions of architecture and training.

350

#### 351 **Limitations and future directions.**

352 These discoveries pave the way for many exciting future directions. The most brain-like language models can now be  
353 investigated in richer detail, ideally leading to intuitive theories of their inner workings. Such research is much easier to  
354 perform on models than on biological systems given that all their structure and weights are easily accessible and manipulable  
355 (Cheney et al., 2017; Lindsey et al., 2019). For example, controlled comparisons of architectural variants and training  
356 objectives could define the necessary and sufficient conditions for human-like language processing (Samek et al., 2017),  
357 synergizing with parallel ongoing efforts in NLP to probe ANNs’ linguistic representations (Hewitt & Manning, 2019; Linzen et  
358 al., 2016; Tenney et al., 2020). Here, we worked with off-the-shelf models, and compared their match to neural data based  
359 on their performance on the next-word-prediction task vs. other tasks. Re-training many models on many tasks from scratch  
360 might determine which features are most important for brain predictivity, but is currently prohibitively expensive due to the  
361 vast space of hyper-parameters. Further, the fact that language modeling is inherently built into the evolution of language  
362 models by the NLP community, as noted above, may make it impossible to fully eliminate its influences on the architecture  
363 even for models trained from scratch on other tasks. Similarly, here, we leveraged existing neural datasets. This work can be  
364 expanded in many new directions, including a) assembling a wider range of publicly available language datasets for model  
365 testing (cf. vision (Schrimpf et al., 2018, 2020)); b) collecting data on new language stimuli for which different models make  
366 maximally different predictions (cf. vision; (Golan et al., 2019)), including sampling a wider range of language stimuli (e.g.,  
367 naturalistic dialogs/conversations); c) modeling the fine-grained temporal trajectories of neural responses to language in data  
368 with high temporal resolution (which requires computational accounts that make predictions about representational  
369 dynamics); and d) querying models on the sentence stimuli that elicit the strongest responses in the language network to  
370 generate hypotheses about the critical response-driving feature/feature spaces, and perhaps to discover new organizing  
371 principles of the language system (cf. vision; (Bashivan et al., 2019; Ponce et al., 2019)).

372

373 One of the major limiting factors in modeling the brain’s language network is the availability of adequate recordings. Although  
374 an increasing number of language fMRI, MEG, EEG, and intracranial datasets are becoming publicly available, they often lack  
375 key properties for testing computational language models. In particular, what is needed are data with high signal-to-noise  
376 ratio, where neural responses to a particular stimulus (e.g., sentence) can be reliably estimated. However, most past language  
377 neuroscience research has focused on coarse distinctions (e.g., sentences with vs. without semantic violations, or sentences  
378 with different syntactic structures); as a result, any single sentence is generally only presented once, and neural responses  
379 are averaged across all the sentences within a ‘condition’ (in contrast, monkey physiology studies of vision typically present  
380 each stimulus dozens of times to each animal; e.g., Majaj et al., 2015). (Studies that use ‘naturalistic’ language stimuli like  
381 stories or movies also typically present the stimuli once, although naturally occurring repetitions of words / n-grams can be  
382 useful.) One of the neural datasets in the current study (Pereira2018) presented each sentence thrice to each subject and  
383 exhibited the highest ceiling (0.32; cf. Fedorenko2016: 0.17, Blank2014: 0.20). But even this ceiling is low relative to single  
384 cell recordings in the primate ventral stream (e.g., 0.82 for IT recordings; Schrimpf et al., 2018). Such high reliability may not  
385 be attainable for higher-level cognitive domains like language, where processing is unlikely to be strictly bottom-up/stimulus-

386 driven. However, this is an empirical question that past work has not attempted to answer and that will be important in the  
387 future for building models that can accurately capture the neural mechanisms of language.

388

389 How can we develop models that are even more brain-like? Despite impressive performance on the datasets and metrics  
390 here, ANN language models are far from human-level performance in the hardest problem of language understanding. An  
391 important open direction is to integrate language models like those used here with models and data resources that attempt  
392 to capture aspects of meaning important for commonsense world knowledge (e.g., Bisk et al., 2020; Bosselut et al., 2020; Sap  
393 et al., 2019, 2020; Yi et al., 2018). Such models might capture not only predictive processing in the brain—what word is likely  
394 to come next—but also semantic parsing, mapping language into conceptual representations that support grounded language  
395 understanding and reasoning (Bisk et al., 2020). The fact that language models lack meaning and focus on local linguistic  
396 coherence (Mahowald et al., 2020; Wilcox et al., 2020) may explain why their representations fall short of ceiling on  
397 *Blank2014*, which uses story materials and may therefore require long-range contexts.

398

399 Another key missing piece in the mechanistic modeling of human language processing is a more detailed mapping from model  
400 components onto brain anatomy. In particular, aside from the general targeting of the fronto-temporal language network, it  
401 is unclear which parts of a model map onto which components of the brain’s language processing mechanisms. In models of  
402 vision, for instance, attempts are made to map ANN layers and neurons onto cortical regions (Kubilius et al., 2019) and sub-  
403 regions (Lee & DiCarlo, 2018). However, whereas function and its mapping onto anatomy is at least coarsely defined in the  
404 case of vision (Felleman & Van Essen, 1991), a similar mapping is not yet established in language beyond the broad distinction  
405 between perceptual processing and higher-level linguistic interpretation (e.g. Fedorenko & Thompson-Schill, 2014). The ANN  
406 models of human language processing identified in this work might also serve to uncover these kinds of anatomical  
407 distinctions for the brain’s language network – perhaps, akin to vision, groups of layers relate to different cortical regions and  
408 uncovering increased similarity to neural activity of one group over others could help establish a cortical hierarchy. The brain  
409 network that supports higher-level linguistic interpretation—which we focus on here—is extensive and plausibly contains  
410 meaningful functional dissociations, but how the network is precisely subdivided and what respective roles its different  
411 components play remains debated. Uncovering the internal structure of the human language network, for which intracranial  
412 recording approaches with high spatial and temporal resolution may prove critical (Mukamel & Fried, 2012; Parvizi & Kastner,  
413 2018), would allow us to guide and constrain models of tissue-mapped mechanistic language processing. More precise brain-  
414 to-model mappings would also allow us to test the effects of perturbations on models and compare them against perturbation  
415 effects in humans, as assessed with lesion studies or reversible stimulation. More broadly, anatomically and functionally  
416 precise models are a required software component of any form of brain-machine-interface.

417

#### 418 **Conclusions.**

419 Taken together, our findings suggest that predictive artificial neural networks serve as viable hypotheses for how predictive  
420 language processing is implemented in human neural tissue. They lay a critical foundation for a promising research program  
421 synergizing high-performing mechanistic models of natural language processing with large-scale neural and behavioral  
422 measurements of human language comprehension in a virtuous cycle of integrative modeling: testing model ability to predict  
423 neural and behavioral measurements, dissecting the best-performing models to understand which components are critical  
424 for high brain predictivity, developing better models leveraging this knowledge, and collecting new data to challenge and  
425 constrain the future generations of neurally plausible models of language processing.

426

## References

- 427 Altmann, G. T. M., & Kamide, Y. (1999). Incremental interpretation at verbs: Restricting the domain of subsequent reference.  
428 *Cognition*, 73(3), 247–264. [https://doi.org/10.1016/S0010-0277\(99\)00059-1](https://doi.org/10.1016/S0010-0277(99)00059-1)
- 429 Arora, S., Cohen, N., & Hazan, E. (2018). On the optimization of deep networks: Implicit acceleration by overparameterization.  
430 *International Conference on Machine Learning (ICML)*, 372–389. <http://arxiv.org/abs/1802.06509>
- 431 Bao, P., She, L., McGill, M., & Tsao, D. Y. (2020). A map of object space in primate inferotemporal cortex. *Nature*, 1–6.  
432 <https://doi.org/10.1038/s41586-020-2350-5>
- 433 Bashivan, P., Kar, K., & DiCarlo, J. J. (2019). Neural population control via deep image synthesis. *Science*, 364(6439).  
434 <https://doi.org/10.1126/science.aav9436>
- 435 Bastos, A. M., Usrey, W. M., Adams, R. A., Mangun, G. R., Fries, P., & Friston, K. J. (2012). Canonical Microcircuits for Predictive  
436 Coding. *Neuron*, 76(4), 695–711. <https://doi.org/10.1016/j.neuron.2012.10.038>
- 437 Bates, E., Wilson, S. M., Saygin, A. P., Dick, F., Sereno, M. I., Knight, R. T., & Dronker, N. F. (2003). Voxel-based lesion-symptom  
438 mapping. *Nature Neuroscience*, 6(5), 448–450. <https://doi.org/10.1038/nn1050>
- 439 Bautista, A., & Wilson, S. M. (2016). Neural responses to grammatically and lexically degraded speech. *Language, Cognition  
440 and Neuroscience*, 31(4), 567–574. <https://doi.org/10.1080/23273798.2015.1123281>
- 441 Binder, J. R., Frost, J. A., Hammeke, T. A., Cox, R. W., Rao, S. M., & Prieto, T. (1997). Human brain language areas identified by  
442 functional magnetic resonance imaging. *Journal of Neuroscience*, 17(1), 353–362.  
443 <https://doi.org/10.1523/JNEUROSCI.17-01-00353.1997>
- 444 Bisk, Y., Holtzman, A., Thomason, J., Andreas, J., Bengio, Y., Chai, J., Lapata, M., Lazaridou, A., May, J., Nisnevich, A., Pinto, N.,  
445 & Turian, J. (2020). Experience Grounds Language. *ArXiv Preprint*. <http://arxiv.org/abs/2004.10151>
- 446 Blank, I. A., & Fedorenko, E. (2017). Domain-general brain regions do not track linguistic input as closely as language-selective  
447 regions. *The Journal of Neuroscience*, 37(41), 9999–10011. <https://doi.org/10.1523/JNEUROSCI.3642-16.2017>
- 448 Blank, I. A., & Fedorenko, E. (2020). No evidence for differences among language regions in their temporal receptive windows.  
449 *NeuroImage*, 219, 116925. <https://doi.org/10.1016/j.neuroimage.2020.116925>
- 450 Blank, I., Balewski, Z., Mahowald, K., & Fedorenko, E. (2016). Syntactic processing is distributed across the language system.  
451 *NeuroImage*, 127, 307–323. <https://doi.org/10.1016/j.neuroimage.2015.11.069>
- 452 Blank, I., Kanwisher, N., & Fedorenko, E. (2014). A functional dissociation between language and multiple-demand systems  
453 revealed in patterns of BOLD signal fluctuations. *Journal of Neurophysiology*, 112(5), 1105–1118.  
454 <https://doi.org/10.1152/jn.00884.2013>
- 455 Bosselut, A., Rashkin, H., Sap, M., Malaviya, C., Celikyilmaz, A., & Choi, Y. (2020). CoMET: Commonsense transformers for  
456 automatic knowledge graph construction. *Association for Computational Linguistics (ACL)*, 4762–4779.  
457 <https://doi.org/10.18653/v1/p19-1470>
- 458 Brennan, J. R., & Pylkkänen, L. (2017). MEG Evidence for Incremental Sentence Composition in the Anterior Temporal Lobe.  
459 *Cognitive Science*, 41, 1515–1531. <https://doi.org/10.1111/cogs.12445>
- 460 Brennan, J. R., Stabler, E. P., Van Wagenen, S. E., Luh, W. M., & Hale, J. T. (2016). Abstract linguistic structure correlates with  
461 temporal activity during naturalistic comprehension. *Brain and Language*, 157–158, 81–94.  
462 <https://doi.org/10.1016/j.bandl.2016.04.008>
- 463 Buzsáki, G., Anastassiou, C. A., & Koch, C. (2012). The origin of extracellular fields and currents-EEG, ECoG, LFP and spikes.  
464 *Nature Reviews Neuroscience*, 13(6), 407–420. <https://doi.org/10.1038/nrn3241>
- 465 Cadena, S. A., Denfield, G. H., Walker, E. Y., Gatys, L. A., Tolia, A. S., Bethge, M., & Ecker, A. S. (2019). Deep convolutional  
466 models improve predictions of macaque V1 responses to natural images. *PLOS Computational Biology*, 15(4), 1–27.  
467 <https://doi.org/10.1371/journal.pcbi.1006897>
- 468 Carey, S., & Bartlett, E. (1978). Acquiring a single new word. *Papers and Reports on Child Language Development*, 15, 17–29.
- 469 Caucheteux, C., & King, J.-R. (2020). Language Processing in Brains and Deep Neural Networks: Computational Convergence  
470 and its Limits. *BioRxiv Preprint*. <https://doi.org/10.1101/2020.07.03.186288>
- 471 Cer, D., Diab, M., Agirre, E., Lopez-Gazpio, I., & Specia, L. (2018). SemEval-2017 Task 1: Semantic Textual Similarity Multilingual  
472 and Crosslingual Focused Evaluation. *International Workshop on Semantic Evaluation*, 1–14.  
473 <https://doi.org/10.18653/v1/s17-2001>
- 474 Chelba, C., Mikolov, T., Schuster, M., Ge, Q., Brants, T., Koehn, P., & Robinson, T. (2014). One billion word benchmark for  
475 measuring progress in statistical language modeling. *Annual Conference of the International Speech Communication  
476 Association*, 2635–2639. <http://arxiv.org/abs/1312.3005>
- 477 Cheney, N., Schrimpf, M., & Kreiman, G. (2017). On the Robustness of Convolutional Neural Networks to Internal Architecture



- 478 and Weight Perturbations. *ArXiv Preprint*. <http://arxiv.org/abs/1703.08245>
- 479 Christiansen, M. H., & Chater, N. (1999). Toward a connectionist model of recursion in human linguistic performance. *Cognitive Science*, 23(2), 157–205. [https://doi.org/10.1207/s15516709cog2302\\_2](https://doi.org/10.1207/s15516709cog2302_2)
- 480
- 481 Cichy, R. M., Khosla, A., Pantazis, D., Torralba, A., & Oliva, A. (2016). Comparison of deep neural networks to spatio-temporal  
482 cortical dynamics of human visual object recognition reveals hierarchical correspondence. *Scientific Reports*, 6.  
483 <https://doi.org/10.1038/srep27755>
- 484 Cireşan, D., Meier, U., & Schmidhuber, J. (2012). Multi-column deep neural networks for image classification. *Computer Vision  
485 and Pattern Recognition (CVPR)*, 3642–3649. <https://doi.org/10.1109/CVPR.2012.6248110>
- 486 Clark, A. (2013). Whatever next? Predictive brains, situated agents, and the future of cognitive science. *Behavioral and Brain  
487 Sciences*, 36(3), 181–204. <https://doi.org/10.1017/S0140525X12000477>
- 488 Conneau, A., Khandelwal, K., Goyal, N., Chaudhary, V., Wenzek, G., Guzmán, F., Grave, E., Ott, M., Zettlemoyer, L., & Stoyanov,  
489 V. (2019). Unsupervised Cross-lingual Representation Learning at Scale. *ArXiv Preprint*. <http://arxiv.org/abs/1911.02116>
- 490 Cover, T. M. (1965). Geometrical and Statistical Properties of Systems of Linear Inequalities with Applications in Pattern  
491 Recognition. In *IEEE Transactions on Electronic Computers: Vol. EC-14* (Issue 3, pp. 326–334).  
492 <https://doi.org/10.1109/PGEC.1965.264137>
- 493 Dai, Z., Yang, Z., Yang, Y., Carbonell, J., Le, Q. V., & Salakhutdinov, R. (2020). Transformer-XL: Attentive language models  
494 beyond a fixed-length context. *Association for Computational Linguistics (ACL)*, 2978–2988.  
495 <https://doi.org/10.18653/v1/p19-1285>
- 496 Demberg, V., & Keller, F. (2008). Data from eye-tracking corpora as evidence for theories of syntactic processing complexity.  
497 *Cognition*, 109(2), 193–210. <https://doi.org/10.1016/j.cognition.2008.07.008>
- 498 Deniz, F., Nunez-Elizalde, A. O., Huth, A. G., & Gallant, J. L. (2019). The Representation of Semantic Information Across Human  
499 Cerebral Cortex During Listening Versus Reading Is Invariant to Stimulus Modality. *Journal of Neuroscience*, 39(39),  
500 7722–7736. <https://doi.org/10.1523/JNEUROSCI.0675-19.2019>
- 501 Devlin, J., Chang, M.-W., Lee, K., & Toutanova, K. (2018). BERT: Pre-training of Deep Bidirectional Transformers for Language  
502 Understanding. *ArXiv Preprint*. <https://arxiv.org/abs/1810.04805>
- 503 Diachek, E., Blank, I., Siegelman, M., Affourtit, J., & Fedorenko, E. (2020). The domain-general multiple demand (MD) network  
504 does not support core aspects of language comprehension: A large-scale fMRI investigation. *Journal of Neuroscience*,  
505 40(23), 4536–4550. <https://doi.org/10.1523/JNEUROSCI.2036-19.2020>
- 506 Dickinson, D. K. (1984). First impressions: Children’s knowledge of words gained from a single exposure. *Applied  
507 Psycholinguistics*, 5(4), 359–373. <https://doi.org/10.1017/S0142716400005233>
- 508 Dieng, A. B., Ruiz, F. J. R., & Blei, D. M. (2019). Topic Modeling in Embedding Spaces. *ArXiv Preprint*.  
509 <http://arxiv.org/abs/1907.04907>
- 510 Ding, N., Melloni, L., Zhang, H., Tian, X., & Poeppel, D. (2015). Cortical tracking of hierarchical linguistic structures in connected  
511 speech. *Nature Neuroscience*, 19(1), 158–164. <https://doi.org/10.1038/nn.4186>
- 512 Dolan, W. B., & Brockett, C. (2005). Automatically Constructing a Corpus of Sentential Paraphrases. *International Workshop  
513 on Paraphrasing (IWP)*, 9–16. <https://research.microsoft.com/apps/pubs/default.aspx?id=101076>
- 514 Dotlačil, J. (2018). Building an ACT-R Reader for Eye-Tracking Corpus Data. *Topics in Cognitive Science*, 10(1), 144–160.  
515 <https://doi.org/10.1111/tops.12315>
- 516 Elman, J. L. (1990). Finding Structure in Time. *Cognitive Science*, 14(2), 179–211.  
517 [https://doi.org/10.1207/s15516709cog1402\\_1](https://doi.org/10.1207/s15516709cog1402_1)
- 518 Elman, J. L. (1991). Distributed representations, simple recurrent networks, and grammatical structure. *Machine Learning*,  
519 7(2–3), 195–225. <https://doi.org/10.1007/bf00114844>
- 520 Elman, J. L. (1993). Learning and development in neural networks: the importance of starting small. *Cognition*, 48(1), 71–99.  
521 [https://doi.org/10.1016/0010-0277\(93\)90058-4](https://doi.org/10.1016/0010-0277(93)90058-4)
- 522 Ethayarajh, K. (2019). How Contextual are Contextualized Word Representations? Comparing the Geometry of BERT, ELMo,  
523 and GPT-2 Embeddings. *Empirical Methods in Natural Language Processing (EMNLP)*, 55–65.  
524 <http://arxiv.org/abs/1909.00512>
- 525 Fedorenko, E., Behr, M. K., & Kanwisher, N. (2011). Functional specificity for high-level linguistic processing in the human  
526 brain. *Proceedings of the National Academy of Sciences (PNAS)*, 108(39), 16428–16433.  
527 <https://doi.org/10.1073/pnas.1112937108>
- 528 Fedorenko, E., Blank, I., Siegelman, M., & Mineroff, Z. (2020). Lack of selectivity for syntax relative to word meanings  
529 throughout the language network. *BioRxiv Preprint*. <https://doi.org/10.1101/477851>
- 530 Fedorenko, E., Hsieh, P. J., Nieto-Castañón, A., Whitfield-Gabrieli, S., & Kanwisher, N. (2010). New method for fMRI

- 531 investigations of language: Defining ROIs functionally in individual subjects. *Journal of Neurophysiology*, 104(2), 1177–  
532 1194. <https://doi.org/10.1152/jn.00032.2010>
- 533 Fedorenko, E., Nieto-Castañón, A., & Kanwisher, N. (2012). Lexical and syntactic representations in the brain: An fMRI  
534 investigation with multi-voxel pattern analyses. *Neuropsychologia*, 50(4), 499–513.  
535 <https://doi.org/10.1016/j.neuropsychologia.2011.09.014>
- 536 Fedorenko, E., Scott, T. L., Brunner, P., Coon, W. G., Pritchett, B., Schalk, G., & Kanwisher, N. (2016). Neural correlate of the  
537 construction of sentence meaning. *Proceedings of the National Academy of Sciences of the United States of America*  
538 (PNAS), 113(41), E6256–E6262. <https://doi.org/10.1073/pnas.1612132113>
- 539 Fedorenko, E., & Thompson-Schill, S. L. (2014). Reworking the language network. *Trends in Cognitive Sciences*, 18(3), 120–  
540 126. <https://doi.org/10.1016/j.tics.2013.12.006>
- 541 Felleman, D. J., & Van Essen, D. C. (1991). Distributed hierarchical processing in the primate cerebral cortex. *Cerebral Cortex*,  
542 1(1), 1–47. <https://doi.org/10.1093/cercor/1.1.1>
- 543 Ferreira, F., Bailey, K. G. D., & Ferraro, V. (2002). Good-enough representations in language comprehension. *Current Directions*  
544 *in Psychological Science*, 11(1), 11–15. <https://doi.org/10.1111/1467-8721.00158>
- 545 Frank, S. L., & Bod, R. (2011). Insensitivity of the human sentence-processing system to hierarchical structure. *Psychological*  
546 *Science*, 22(6), 829–834. <https://doi.org/10.1177/0956797611409589>
- 547 Frank, S. L., Otten, L. J., Galli, G., & Vigliocco, G. (2015). The ERP response to the amount of information conveyed by words  
548 in sentences. *Brain and Language*, 140. <https://doi.org/10.1016/j.bandl.2014.10.006>
- 549 Frankle, J., Dziugaite, G. K., Roy, D. M., & Carbin, M. (2019). The Lottery Ticket Hypothesis at Scale. *ArXiv Preprint*.  
550 <http://arxiv.org/abs/1903.01611>
- 551 Friederici, A. D. (2012). The cortical language circuit: From auditory perception to sentence comprehension. *Trends in*  
552 *Cognitive Sciences*, 16(5), 262–268. <https://doi.org/10.1016/j.tics.2012.04.001>
- 553 Fukushima, K. (1988). Neocognitron: A hierarchical neural network capable of visual pattern recognition. *Neural Networks*,  
554 1(2), 119–130. [https://doi.org/10.1016/0893-6080\(88\)90014-7](https://doi.org/10.1016/0893-6080(88)90014-7)
- 555 Futrell, R., Gibson, E., & Levy, R. P. (2020). Lossy-Context Surprisal: An Information-Theoretic Model of Memory Effects in  
556 Sentence Processing. *Cognitive Science*, 44(3). <https://doi.org/10.1111/cogs.12814>
- 557 Futrell, R., Gibson, E., Tily, H. J., Blank, I., Vishnevetsky, A., Piantadosi, S. T., & Fedorenko, E. (2020). The natural stories corpus.  
558 *International Conference on Language Resources and Evaluation (LREC)*, 76–82. <http://arxiv.org/abs/1708.05763>
- 559 Garnsey, S. M., Pearlmutter, N. J., Myers, E., & Lotocky, M. A. (1997). The contributions of verb bias and plausibility to the  
560 comprehension of temporarily ambiguous sentences. *Journal of Memory and Language*, 37(1), 58–93.  
561 <https://doi.org/10.1006/jmla.1997.2512>
- 562 Gauthier, J., & Ivanova, A. (2018). *Does the brain represent words? An evaluation of brain decoding studies of language*  
563 *understanding*. <http://arxiv.org/abs/1806.00591>
- 564 Gauthier, J., & Levy, R. (2019). Linking artificial and human neural representations of language. *Empirical Methods for Natural*  
565 *Language Processing (EMNLP)*, 529–539. <https://doi.org/10.18653/v1/d19-1050>
- 566 Geiger, F., Schrimpf, M., Marques, T., & Dicarlo, J. J. (2020). Wiring Up Vision : Minimizing Supervised Synaptic Updates  
567 Needed to Produce a Primate Ventral Stream. *BioRxiv Preprint*. <https://doi.org/10.1101/2020.06.08.140111>
- 568 Gibson, E. (1998). Linguistic complexity: Locality of syntactic dependencies. *Cognition*, 68(1). <https://doi.org/10.1016/S0010-569>  
569 0277(98)00034-1
- 570 Gibson, E., Bergen, L., & Piantadosi, S. T. (2013). Rational integration of noisy evidence and prior semantic expectations in  
571 sentence interpretation. *Proceedings of the National Academy of Sciences of the United States of America (PNAS)*,  
572 110(20), 8051–8056. <https://doi.org/10.1073/pnas.1216438110>
- 573 Golan, T., Raju, P. C., & Kriegeskorte, N. (2019). Controversial stimuli: pitting neural networks against each other as models of  
574 human recognition. *ArXiv Preprint*. <http://arxiv.org/abs/1911.09288>
- 575 Goldstein, A., Zada, Z., Buchnik, E., Schain, M., Price, A., Aubrey, B., Nastase, S. A., Feder, A., Emanuel, D., Cohen, A., Jansen,  
576 A., Gazula, H., Choe, G., Rao, A., Kim, C., Casto, C., Lora, F., Flinker, A., Devore, S., ... Hasson, U. (2020). Thinking ahead:  
577 Prediction in context as a keystone of language in humans and machines. *BioRxiv Preprint*.  
578 <https://doi.org/10.1101/2020.12.02.403477>
- 579 Goodkind, A., & Bicknell, K. (2018). Predictive power of word surprisal for reading times is a linear function of language model  
580 quality. *Cognitive Modeling and Computational Linguistics (CMCL)*, 10–18. <https://doi.org/10.18653/v1/w18-0102>
- 581 Gorno-Tempini, M. L., Dronkers, N. F., Rankin, K. P., Ogar, J. M., Phengrasamy, L., Rosen, H. J., Johnson, J. K., Weiner, M. W.,  
582 & Miller, B. L. (2004). Cognition and Anatomy in Three Variants of Primary Progressive Aphasia. *Annals of Neurology*,  
583 55(3), 335–346. <https://doi.org/10.1002/ana.10825>

- 584 Hagoort, P. (2019). The neurobiology of language beyond single-word processing. *Science*, 366(6461), 55–58.  
585 <https://doi.org/10.1126/science.aax0289>
- 586 Hale, J. (2001). A probabilistic earley parser as a psycholinguistic model. *North American Chapter of the Association for*  
587 *Computational Linguistics (NAACL)*, 1–8. <https://doi.org/10.3115/1073336.1073357>
- 588 Hasson, U., Nastase, S. A., & Goldstein, A. (2020). Direct Fit to Nature: An Evolutionary Perspective on Biological and Artificial  
589 Neural Networks. *Neuron*, 105(3), 416–434. <https://doi.org/10.1016/j.neuron.2019.12.002>
- 590 Heibeck, T. H., & Markman, E. M. (1987). Word Learning in Children: An Examination of Fast Mapping. *Child Development*,  
591 58(4), 1021. <https://doi.org/10.2307/1130543>
- 592 Henderson, J. M., Choi, W., Lowder, M. W., & Ferreira, F. (2016). Language structure in the brain: A fixation-related fMRI study  
593 of syntactic surprisal in reading. *NeuroImage*, 132, 293–300. <https://doi.org/10.1016/j.neuroimage.2016.02.050>
- 594 Hewitt, J., & Manning, C. D. (2019). A structural probe for finding syntax in word representations. *North American Chapter of*  
595 *the Association for Computational Linguistics (NAACL)*, 1, 4129–4138.
- 596 Hu, J., Gauthier, J., Qian, P., Wilcox, E., & Levy, R. P. (2020). *A Systematic Assessment of Syntactic Generalization in Neural*  
597 *Language Models*. <http://arxiv.org/abs/2005.03692>
- 598 Huth, A. G., de Heer, W. A., Griffiths, T. L., Theunissen, F. E., & Gallant, J. L. (2016). Natural speech reveals the semantic maps  
599 that tile human cerebral cortex. *Nature*, 532(7600), 453–458. <https://doi.org/10.1038/nature17637>
- 600 Jain, S., & Huth, A. (2018, May 21). Incorporating Context into Language Encoding Models for fMRI. *Neural Information*  
601 *Processing Systems (NeurIPS)*. <https://doi.org/10.1101/327601>
- 602 Jozefowicz, R., Vinyals, O., Schuster, M., Shazeer, N., & Wu, Y. (2016). *Exploring the Limits of Language Modeling*.  
603 <http://arxiv.org/abs/1602.02410>
- 604 Jurafsky, D. (1996). A Probabilistic Model of Lexical and Syntactic Access and Disambiguation. *Cognitive Science*, 20(2), 137–  
605 194. [https://doi.org/10.1207/s15516709cog2002\\_1](https://doi.org/10.1207/s15516709cog2002_1)
- 606 Just, M. A., & Carpenter, P. A. (1980). A theory of reading: From eye fixations to comprehension. *Psychological Review*, 87(4),  
607 329–354. <https://doi.org/10.1037/0033-295X.87.4.329>
- 608 Just, M. A., Carpenter, P. A., & Woolley, J. D. (1982). Paradigms and processes in reading comprehension. *Journal of*  
609 *Experimental Psychology: General*, 111(2), 228–238. <https://doi.org/10.1037/0096-3445.111.2.228>
- 610 Kell, A. J. E., Yamins, D. L. K., Shook, E. N., Norman-Haignere, S. V., & McDermott, J. H. (2018). A Task-Optimized Neural  
611 Network Replicates Human Auditory Behavior, Predicts Brain Responses, and Reveals a Cortical Processing Hierarchy.  
612 *Neuron*, 98(3), 630–644. <https://doi.org/10.1016/j.neuron.2018.03.044>
- 613 Keller, G. B., & Mrcic-Flogel, T. D. (2018). Predictive Processing: A Canonical Cortical Computation. *Neuron*, 100(2), 424–435.  
614 <https://doi.org/10.1016/j.neuron.2018.10.003>
- 615 Keskar, N. S., McCann, B., Varshney, L. R., Xiong, C., & Socher, R. (2019). CTRL: A Conditional Transformer Language Model for  
616 Controllable Generation. *ArXiv Preprint*. <http://arxiv.org/abs/1909.05858>
- 617 Kietzmann, T. C., Spoerer, C. J., Sörensen, L. K. A., Cichy, R. M., Hauk, O., & Kriegeskorte, N. (2019). Recurrence is required to  
618 capture the representational dynamics of the human visual system. *Proceedings of the National Academy of Sciences*  
619 *(PNAS)*, 116(43), 21854–21863. <https://doi.org/10.1073/pnas.1905544116>
- 620 Kiros, R., Zhu, Y., Salakhutdinov, R. R., Zemel, R., Urtasun, R., Torralba, A., & Fidler, S. (2015). Skip-Thought Vectors. *Neural*  
621 *Information Processing Systems (NIPS)*, 3294–3302. <http://papers.nips.cc/paper/5950-skip-thought-vectors>
- 622 Kriegeskorte, N. (2008). Representational similarity analysis – connecting the branches of systems neuroscience. *Frontiers in*  
623 *Systems Neuroscience*, 2. <https://doi.org/10.3389/neuro.06.004.2008>
- 624 Krizhevsky, A., Sutskever, I., & Hinton, G. E. (2012). ImageNet Classification with Deep Convolutional Neural Networks. *Neural*  
625 *Information Processing Systems (NIPS)*. <https://doi.org/http://dx.doi.org/10.1016/j.protcy.2014.09.007>
- 626 Kubilius, J., Schrimpf, M., Hong, H., Majaj, N. J., Rajalingham, R., Issa, E. B., Kar, K., Bashivan, P., Prescott-Roy, J., Schmidt, K.,  
627 Nayebi, A., Bear, D., Yamins, D. L. K., & DiCarlo, J. J. (2019). Brain-Like Object Recognition with High-Performing Shallow  
628 Recurrent ANNs. In H. Wallach, H. Larochelle, A. Beygelzimer, F. D’Alché-Buc, E. Fox, & R. Garnett (Eds.), *Neural*  
629 *Information Processing Systems (NeurIPS)* (pp. 12785–12796). Curran Associates, Inc. <http://arxiv.org/abs/1909.06161>
- 630 Kuperberg, G. R., & Jaeger, T. F. (2016). What do we mean by prediction in language comprehension? *Language, Cognition*  
631 *and Neuroscience*, 31(1), 32–59. <https://doi.org/10.1080/23273798.2015.1102299>
- 632 Lakretz, Y., Dehaene, S., & King, J. R. (2020). What limits our capacity to process nested long-range dependencies in sentence  
633 comprehension? *Entropy*, 22(4), 446. <https://doi.org/10.3390/E22040446>
- 634 Lample, G., & Conneau, A. (2019). Cross-lingual Language Model Pretraining. *Neural Information Processing Systems*  
635 *(NeurIPS)*, 7059–7069. <http://arxiv.org/abs/1901.07291>
- 636 Lan, Z., Chen, M., Goodman, S., Gimpel, K., Sharma, P., & Soricut, R. (2019). ALBERT: A Lite BERT for Self-supervised Learning

- 637 of Language Representations. *ArXiv Preprint*. <http://arxiv.org/abs/1909.11942>
- 638 Lawrence Marple, S. (1999). Computing the discrete-time analytic signal via fft. *IEEE Transactions on Signal Processing*, 47(9),  
639 2600–2603. <https://doi.org/10.1109/78.782222>
- 640 Lee, H., & DiCarlo, J. (2018, September 21). Topographic Deep Artificial Neural Networks (TDANNs) predict face selectivity  
641 topography in primate inferior temporal (IT) cortex. *Cognitive Computational Neuroscience (CCN)*.  
642 <https://doi.org/10.32470/ccn.2018.1085-0>
- 643 Levesque, H. J., Davis, E., & Morgenstern, L. (2012). The winograd schema challenge. *International Workshop on Temporal*  
644 *Representation and Reasoning*, 552–561. [www.aaai.org](http://www.aaai.org)
- 645 Levy, R. (2008a). Expectation-based syntactic comprehension. *Cognition*, 106(3), 1126–1177.  
646 <https://doi.org/10.1016/j.cognition.2007.05.006>
- 647 Levy, R. (2008b). A noisy-channel model of rational human sentence comprehension under uncertain input. *Empirical*  
648 *Methods in Natural Language Processing (EMNLP)*, 234–243. <https://doi.org/10.3115/1613715.1613749>
- 649 Lewis, R. L., Vasishth, S., & Van Dyke, J. A. (2006). Computational principles of working memory in sentence comprehension.  
650 *Trends in Cognitive Sciences*, 10(10), 447–454. <https://doi.org/10.1016/j.tics.2006.08.007>
- 651 Lindsey, J., Ocko, S. A., Ganguli, S., & Deny, S. (2019, January 3). A unified theory of early visual representations from retina  
652 to cortex through anatomically constrained deep cnNs. *International Conference on Learning Representations (ICLR)*.  
653 <http://arxiv.org/abs/1901.00945>
- 654 Linzen, T., Dupoux, E., & Goldberg, Y. (2016). Assessing the Ability of LSTMs to Learn Syntax-Sensitive Dependencies.  
655 *Transactions of the Association for Computational Linguistics*, 4, 521–535. [https://doi.org/10.1162/tacl\\_a\\_00115](https://doi.org/10.1162/tacl_a_00115)
- 656 Liu, Y., Ott, M., Goyal, N., Du, J., Joshi, M., Chen, D., Levy, O., Lewis, M., Zettlemoyer, L., & Stoyanov, V. (2019). RoBERTa: A  
657 Robustly Optimized BERT Pretraining Approach. *ArXiv Preprint*. <http://arxiv.org/abs/1907.11692>
- 658 Lopopolo, A., Frank, S. L., Van Den Bosch, A., & Willems, R. M. (2017). Using stochastic language models (SLM) to map lexical,  
659 syntactic, and phonological information processing in the brain. *PLoS ONE*, 12(5).  
660 <https://doi.org/10.1371/journal.pone.0177794>
- 661 Lyu, B., Choi, H. S., Marslen-Wilson, W. D., Clarke, A., Randall, B., & Tyler, L. K. (2019). Neural dynamics of semantic  
662 composition. *Proceedings of the National Academy of Sciences (PNAS)*, 116(42), 21318–21327.  
663 <https://doi.org/10.1073/pnas.1903402116>
- 664 MacDonald, M. C., Pearlmutter, N. J., & Seidenberg, M. S. (1994). The lexical nature of syntactic ambiguity resolution.  
665 *Psychological Review*, 101(4), 676–703. <https://doi.org/10.1037/0033-295x.101.4.676>
- 666 Mahowald, K., Kachergis, G., & Frank, M. C. (2020). What counts as an exemplar model, anyway? A commentary on Ambridge  
667 (2020). *First Language*. <https://doi.org/10.1177/0142723720905920>
- 668 Marcus, G. (2018). Deep Learning: A Critical Appraisal. *ArXiv Preprint*. <http://arxiv.org/abs/1801.00631>
- 669 McDonald, J., & Macwhinney, B. (1998). Maximum Likelihood Models for Sentence Processing. In *The Crosslinguistic Study of*  
670 *Sentence Processing*.  
671 [https://www.researchgate.net/publication/230876309\\_Maximum\\_Likelihood\\_Models\\_for\\_Sentence\\_Processing](https://www.researchgate.net/publication/230876309_Maximum_Likelihood_Models_for_Sentence_Processing)
- 672 McRae, K., Spivey-Knowlton, M. J., & Tanenhaus, M. K. (1998). Modeling the Influence of Thematic Fit (and Other Constraints)  
673 in On-line Sentence Comprehension. *Journal of Memory and Language*, 38(3), 283–312.  
674 <https://doi.org/10.1006/jmla.1997.2543>
- 675 Merchant, A., Rahimtoroghi, E., Pavlick, E., & Tenney, I. (2020). What happens to BERT embeddings during fine-tuning? In  
676 *arXiv preprint*. arXiv. <https://doi.org/10.18653/v1/2020.blackboxnlp-1.4>
- 677 Merity, S., Xiong, C., Bradbury, J., & Socher, R. (2016). Pointer Sentinel Mixture Models. *ArXiv Preprint*.  
678 <http://arxiv.org/abs/1609.07843>
- 679 Merks, D., & Frank, S. L. (2020). Comparing Transformers and RNNs on predicting human sentence processing data. *ArXiv*  
680 *Preprint*. <http://arxiv.org/abs/2005.09471>
- 681 Mikolov, T., Sutskever, I., Chen, K., Corrado, G., & Dean, J. (2013, October 16). Distributed representations of words and  
682 phrases and their compositionality. *Neural Information Processing Systems (NIPS)*. <http://arxiv.org/abs/1310.4546>
- 683 Millet, J., & King, J.-R. (2021). Inductive biases, pretraining and fine-tuning jointly account for brain responses to speech. *ArXiv*  
684 *Preprint*. <http://arxiv.org/abs/2103.01032>
- 685 Mitchell, D. C. (1984). Computational psycholinguistics View project Psycholinguistics View project. *New Methods in Reading*  
686 *Comprehension Research*. <https://www.researchgate.net/publication/286455549>
- 687 Mitchell, T. M., Shinkareva, S. V., Carlson, A., Chang, K. M., Malave, V. L., Mason, R. A., & Just, M. A. (2008). Predicting human  
688 brain activity associated with the meanings of nouns. *Science*, 320(5880), 1191–1195.  
689 <https://doi.org/10.1126/science.1152876>



- 690 Mollica, F., Siegelman, M., Diachek, E., Piantadosi, S. T., Mineroff, Z., Futrell, R., Kean, H., Qian, P., & Fedorenko, E. (2020).  
691 Composition is the Core Driver of the Language-selective Network. *Neurobiology of Language*, 104–134.  
692 [https://doi.org/10.1162/nol\\_a\\_00005](https://doi.org/10.1162/nol_a_00005)
- 693 Monti, M. M., Parsons, L. M., & Osherson, D. N. (2012). Thought Beyond Language: Neural Dissociation of Algebra and Natural  
694 Language. *Psychological Science*, 23(8), 914–922. <https://doi.org/10.1177/0956797612437427>
- 695 Mukamel, R., & Fried, I. (2012). Human Intracranial Recordings and Cognitive Neuroscience. *Annual Review of Psychology*,  
696 63(1), 511–537. <https://doi.org/10.1146/annurev-psych-120709-145401>
- 697 Mumford, D. (1992). On the computational architecture of the neocortex - II The role of cortico-cortical loops. *Biological*  
698 *Cybernetics*, 66(3), 241–251. <https://doi.org/10.1007/BF00198477>
- 699 Nelson, M. J., El Karoui, I., Giber, K., Yang, X., Cohen, L., Koopman, H., Cash, S. S., Naccache, L., Hale, J. T., Pallier, C., & Dehaene,  
700 S. (2017). Neurophysiological dynamics of phrase-structure building during sentence processing. *Proceedings of the*  
701 *National Academy of Sciences of the United States of America (PNAS)*, 114(18), E3669–E3678.  
702 <https://doi.org/10.1073/pnas.1701590114>
- 703 Pallier, C., Devauchelle, A. D., & Dehaene, S. (2011). Cortical representation of the constituent structure of sentences.  
704 *Proceedings of the National Academy of Sciences of the United States of America (PNAS)*, 108(6), 2522–2527.  
705 <https://doi.org/10.1073/pnas.1018711108>
- 706 Parvizi, J., & Kastner, S. (2018). Promises and limitations of human intracranial electroencephalography. *Nature Neuroscience*,  
707 21(4), 474–483. <https://doi.org/10.1038/s41593-018-0108-2>
- 708 Pennington, J., Socher, R., & Manning, C. D. (2014). Glove: Global Vectors for Word Representation. *Proceedings of the 2014*  
709 *Conference on Empirical Methods in Natural Language Processing (EMNLP)*, 1532–1543.  
710 <https://doi.org/10.3115/v1/D14-1162>
- 711 Pereira, F., Lou, B., Pritchett, B., Ritter, S., Gershman, S. J., Kanwisher, N., Botvinick, M., & Fedorenko, E. (2018). Toward a  
712 universal decoder of linguistic meaning from brain activation. *Nature Communications*, 9.  
713 <https://doi.org/10.1038/s41467-018-03068-4>
- 714 Pinker, S., & Prince, A. (1988). On language and connectionism: Analysis of a parallel distributed processing model of language  
715 acquisition. *Cognition*, 28(1–2), 73–193. [https://doi.org/10.1016/0010-0277\(88\)90032-7](https://doi.org/10.1016/0010-0277(88)90032-7)
- 716 Ponce, C. R., Xiao, W., Schade, P. F., Hartmann, T. S., Kreiman, G., & Livingstone, M. S. (2019). Evolving Images for Visual  
717 Neurons Using a Deep Generative Network Reveals Coding Principles and Neuronal Preferences. *Cell*, 177(4), 999–1009.  
718 <https://doi.org/10.1016/j.cell.2019.04.005>
- 719 Price, C. J. (2010). The anatomy of language: A review of 100 fMRI studies published in 2009. In *Annals of the New York*  
720 *Academy of Sciences* (Vol. 1191, pp. 62–88). <https://doi.org/10.1111/j.1749-6632.2010.05444.x>
- 721 Rabovsky, M., Hansen, S. S., & McClelland, J. L. (2018). Modelling the N400 brain potential as change in a probabilistic  
722 representation of meaning. *Nature Human Behaviour*, 2(9), 693–705. <https://doi.org/10.1038/s41562-018-0406-4>
- 723 Radford, A., Narasimhan, K., Salimans, T., & Sutskever, I. (2018). *Improving Language Understanding by Generative Pre-*  
724 *Training*. <https://gluebenchmark.com/leaderboard>
- 725 Radford, A., Wu, J., Child, R., Luan, D., Amodei, D., & Sutskever, I. (2019). Language Models are Unsupervised Multitask  
726 Learners. *ArXiv Preprint*. <https://github.com/codelucas/newspaper>
- 727 Raffel, C., Shazeer, N., Roberts, A., Lee, K., Narang, S., Matena, M., Zhou, Y., Li, W., & Liu, P. J. (2019). Exploring the Limits of  
728 Transfer Learning with a Unified Text-to-Text Transformer. *ArXiv Preprint*. <http://arxiv.org/abs/1910.10683>
- 729 Rahimi, A., & Recht, B. (2009). Random features for large-scale kernel machines. *Neural Information Processing Systems*  
730 *(NIPS)*.
- 731 Rajalingham, R., Issa, E. B., Bashivan, P., Kar, K., Schmidt, K., & DiCarlo, J. J. (2018). Large-Scale, High-Resolution Comparison  
732 of the Core Visual Object Recognition Behavior of Humans, Monkeys, and State-of-the-Art Deep Artificial Neural  
733 Networks. *The Journal of Neuroscience*, 38(33), 7255–7269. <https://doi.org/10.1523/JNEUROSCI.0388-18.2018>
- 734 Rajpurkar, P., Zhang, J., Lopyrev, K., & Liang, P. (2016). SQuad: 100,000+ questions for machine comprehension of text.  
735 *Empirical Methods in Natural Language Processing (EMNLP)*, 2383–2392. <http://arxiv.org/abs/1606.05250>
- 736 Rao, R. P. N., & Ballard, D. H. (1999). Predictive coding in the visual cortex: a functional interpretation of some extra-classical  
737 receptive-field effects. *Nature Neuroscience*, 2(1), 79–87. <https://doi.org/10.1038/4580>
- 738 Rayner, K. (1978). Eye movements in reading and information processing. *Psychological Bulletin*, 85(3), 618–660.  
739 <https://doi.org/10.1037/0033-2909.85.3.618>
- 740 Regev, M., Honey, C. J., Simony, E., & Hasson, U. (2013). Selective and invariant neural responses to spoken and written  
741 narratives. *Journal of Neuroscience*, 33(40), 15978–15988. <https://doi.org/10.1523/JNEUROSCI.1580-13.2013>
- 742 Rohde, D. L. T., & Plaut, D. C. (1999). Language acquisition in the absence of explicit negative evidence: How important is



- 743 starting small? *Cognition*, 72(1), 67–109. [https://doi.org/10.1016/S0010-0277\(99\)00031-1](https://doi.org/10.1016/S0010-0277(99)00031-1)
- 744 Samek, W., Wiegand, T., & Müller, K.-R. (2017). Explainable Artificial Intelligence: Understanding, Visualizing and Interpreting  
745 Deep Learning Models. *ArXiv Preprint*. <http://arxiv.org/abs/1708.08296>
- 746 Sanh, V., Debut, L., Chaumond, J., & Wolf, T. (2019). DistilBERT, a distilled version of BERT: smaller, faster, cheaper and lighter.  
747 *ArXiv Preprint*. <http://arxiv.org/abs/1910.01108>
- 748 Sap, M., Le Bras, R., Allaway, E., Bhagavatula, C., Lourie, N., Rashkin, H., Roof, B., Smith, N. A., & Choi, Y. (2019). ATOMIC: An  
749 Atlas of Machine Commonsense for If-Then Reasoning. *AAAI Conference on Artificial Intelligence*, 33, 3027–3035.  
750 <https://doi.org/10.1609/aaai.v33i01.33013027>
- 751 Sap, M., Rashkin, H., Chen, D., Le Bras, R., & Choi, Y. (2020). Social IQA: Commonsense reasoning about social interactions.  
752 *Empirical Methods in Natural Language Processing (EMNLP)*, 4463–4473. <https://doi.org/10.18653/v1/d19-1454>
- 753 Schrimpf, M., Kubilius, J., Hong, H., Majaj, N. J., Rajalingham, R., Issa, E. B., Kar, K., Bashivan, P., Prescott-Roy, J., Schmidt, K.,  
754 Yamins, D. L. K., & DiCarlo, J. J. (2018). Brain-Score: Which Artificial Neural Network for Object Recognition is most Brain-  
755 Like? *BioRxiv*. <https://doi.org/10.1101/407007>
- 756 Schrimpf, M., Kubilius, J., Lee, M. J., Ratan Murty, N. A., Ajemian, R., & DiCarlo, J. J. (2020). Integrative Benchmarking to  
757 Advance Neurally Mechanistic Models of Human Intelligence. *Neuron*. <https://doi.org/10.1016/j.neuron.2020.07.040>
- 758 Schwartz, D., Toneva, M., & Wehbe, L. (2019). Inducing brain-relevant bias in natural language processing models. *Advances*  
759 *in Neural Information Processing Systems*, 32, 14123–14133. [https://github.com/danrsc/bert\\_brain\\_neurips\\_2019](https://github.com/danrsc/bert_brain_neurips_2019)
- 760 Shain, C., Blank, I. A., van Schijndel, M., Schuler, W., & Fedorenko, E. (2020). fMRI reveals language-specific predictive coding  
761 during naturalistic sentence comprehension. *Neuropsychologia*, 138.  
762 <https://doi.org/10.1016/j.neuropsychologia.2019.107307>
- 763 Singer, Y., Teramoto, Y., Willmore, B. D. B., King, A. J., Schnupp, J. W. H., & Harper, N. S. (2018). Sensory cortex is optimised  
764 for prediction of future input. *ELife*, 7. <https://doi.org/10.7554/eLife.31557>
- 765 Smith, N. J., & Levy, R. (2013). The effect of word predictability on reading time is logarithmic. *Cognition*, 128(3), 302–319.  
766 <https://doi.org/10.1016/j.cognition.2013.02.013>
- 767 Socher, R., Perelygin, A., Wu, J. Y., Chuang, J., Manning, C. D., Ng, A. Y., & Potts, C. (2013). Recursive deep models for semantic  
768 compositionality over a sentiment treebank. *Empirical Methods in Natural Language Processing (EMNLP)*, 1631–1642.  
769 <http://nlp.stanford.edu/>
- 770 Spivey-Knowlton, M. J. (1996). *Integration of visual and linguistic information: Human data and model simulations*. University  
771 of Rochester.
- 772 Spivey, M. J., & Tanenhaus, M. K. (1998). Syntactic ambiguity resolution in discourse: Modeling the effects of referential  
773 context and lexical frequency. *Journal of Experimental Psychology: Learning Memory and Cognition*, 24(6), 1521–1543.  
774 <https://doi.org/10.1037/0278-7393.24.6.1521>
- 775 Srinivasan, M. V., Laughlin, S. B., & Dubs, A. (1982). Predictive coding: A fresh view of inhibition in the retina. *Royal Society of*  
776 *London - Biological Sciences*, 216(1205), 427–459. <https://doi.org/10.1098/rspb.1982.0085>
- 777 Steedman, M. (2000). *The Syntactic Process*. MIT Press. <https://mitpress.mit.edu/books/syntactic-process>
- 778 Tanenhaus, M. K., Spivey-Knowlton, M. J., Eberhard, K. M., & Sedivy, J. C. (1995). Integration of visual and linguistic  
779 information in spoken language comprehension. *Science*, 268(5217), 1632–1634.  
780 <https://doi.org/10.1126/science.7777863>
- 781 Tenenbaum, J. B., Kemp, C., Griffiths, T. L., & Goodman, N. D. (2011). How to Grow a Mind: Statistics, Structure, and  
782 Abstraction. *Science*, 331(6022), 1279–1285. <https://doi.org/10.1126/science.1192788>
- 783 Tenney, I., Das, D., & Pavlick, E. (2020). BERT rediscovers the classical NLP pipeline. *Association for Computational Linguistics*  
784 *(ACL)*, 4593–4601. <https://doi.org/10.18653/v1/p19-1452>
- 785 Tenney, I., Xia, P., Chen, B., Wang, A., Poliak, A., McCoy, R. T., Kim, N., van Durme, B., Bowman, S. R., Das, D., & Pavlick, E.  
786 (2019). What do you learn from context? Probing for sentence structure in contextualized word representations. *ArXiv*  
787 *Preprint*. <http://arxiv.org/abs/1905.06316>
- 788 Toneva, M., & Wehbe, L. (2019). Interpreting and improving natural-language processing (in machines) with natural language-  
789 processing (in the brain). *Advances in Neural Information Processing Systems*, 32, 14954–14964.  
790 <http://arxiv.org/abs/1905.11833>
- 791 Trueswell, J. C., Tanenhaus, M. K., & Garnsey, S. M. (1994). Semantic Influences On Parsing: Use of Thematic Role Information  
792 in Syntactic Ambiguity Resolution. *Journal of Memory and Language*, 33(3), 285–318.  
793 <https://doi.org/10.1006/jmla.1994.1014>
- 794 Trueswell, J. C., Tanenhaus, M. K., & Kello, C. (1993). Verb-Specific Constraints in Sentence Processing: Separating Effects of  
795 Lexical Preference From Garden-Paths. *Journal of Experimental Psychology: Learning, Memory, and Cognition*, 19(3),

- 796 528–553. <https://doi.org/10.1037/0278-7393.19.3.528>
- 797 van Schijndel, M., Exley, A., & Schuler, W. (2013). A Model of Language Processing as Hierarchic Sequential Prediction. *Topics*
- 798 *in Cognitive Science*, 5(3), 522–540. <https://doi.org/10.1111/tops.12034>
- 799 van Schijndel, M., & Linzen, T. (2018). A neural model of adaptation in reading. *Empirical Methods in Natural Language*
- 800 *Processing (EMNLP)*, 4704–4710. <http://arxiv.org/abs/1808.09930>
- 801 Wang, A., Pruksachatkun, Y., Nangia, N., Singh, A., Michael, J., Hill, F., Levy, O., & Bowman, S. R. (2019). SuperGLUE: A Stickier
- 802 Benchmark for General-Purpose Language Understanding Systems. *Neural Information Processing Systems (NeurIPS)*,
- 803 3266–3280. <http://arxiv.org/abs/1905.00537>
- 804 Wang, A., Singh, A., Michael, J., Hill, F., Levy, O., & Bowman, S. R. (2019, September 20). Glue: A multi-task benchmark and
- 805 analysis platform for natural language understanding. *International Conference on Learning Representations (ICLR)*.
- 806 <http://arxiv.org/abs/1804.07461>
- 807 Wang, S., Zhang, J., Wang, H., Lin, N., & Zong, C. (2020). Fine-grained neural decoding with distributed word representations.
- 808 *Information Sciences*, 507, 256–272. <https://doi.org/10.1016/j.ins.2019.08.043>
- 809 Warstadt, A., Singh, A., & Bowman, S. R. (2019). Neural Network Acceptability Judgments. *Transactions of the Association for*
- 810 *Computational Linguistics*, 7, 625–641. [https://doi.org/10.1162/tacl\\_a\\_00290](https://doi.org/10.1162/tacl_a_00290)
- 811 Wehbe, L., Blank, I. A., Shain, C., Futrell, R., Levy, R., Malsburg, T. von der, Smith, N., Gibson, E., & Fedorenko, E. (2020).
- 812 Incremental language comprehension difficulty predicts activity in the language network but not the multiple demand
- 813 network. *BioRxiv Preprint*. <https://doi.org/10.1101/2020.04.15.043844>
- 814 Wehbe, L., Vaswani, A., Knight, K., & Mitchell, T. (2014). Aligning context-based statistical models of language with brain
- 815 activity during reading. *Empirical Methods in Natural Language Processing (EMNLP)*, 233–243.
- 816 <http://www.aclweb.org/anthology/D14-1030>
- 817 Wilcox, E. G., Gauthier, J., Hu, J., Qian, P., & Levy, R. (2020). On the Predictive Power of Neural Language Models for Human
- 818 Real-Time Comprehension Behavior. *ArXiv Preprint*. <http://arxiv.org/abs/2006.01912>
- 819 Willems, R. M., Frank, S. L., Nijhof, A. D., Hagoort, P., & Van Den Bosch, A. (2016). Prediction during Natural Language
- 820 Comprehension. *Cerebral Cortex*, 26(6), 2506–2516. <https://doi.org/10.1093/cercor/bhv075>
- 821 Williams, A., Nangia, N., & Bowman, S. R. (2018). A broad-coverage challenge corpus for sentence understanding through
- 822 inference. *North American Chapter of the Association for Computational Linguistics: Human Language Technologies*
- 823 *(NAACL HLT)*, 1, 1112–1122. <https://doi.org/10.18653/v1/n18-1101>
- 824 Wolf, T., Debut, L., Sanh, V., Chaumond, J., Delangue, C., Moi, A., Cistac, P., Rault, T., Louf, R., Funtowicz, M., & Brew, J. (2019).
- 825 HuggingFace’s Transformers: State-of-the-art Natural Language Processing. *ArXiv Preprint*.
- 826 <http://arxiv.org/abs/1910.03771>
- 827 Yamins, D. L. K., Hong, H., Cadieu, C. F., Solomon, E. A., Seibert, D., & DiCarlo, J. J. (2014). Performance-optimized hierarchical
- 828 models predict neural responses in higher visual cortex. *Proceedings of the National Academy of Sciences (PNAS)*,
- 829 111(23), 8619–8624. <https://doi.org/10.1073/pnas.1403112111>
- 830 Yang, Z., Dai, Z., Yang, Y., Carbonell, J., Salakhutdinov, R., & Le, Q. V. (2019). XLNet: Generalized Autoregressive Pretraining
- 831 for Language Understanding. *ArXiv Preprint*. <http://arxiv.org/abs/1906.08237>
- 832 Yi, K., Torralba, A., Wu, J., Kohli, P., Gan, C., & Tenenbaum, J. B. (2018). Neural-symbolic VQA: Disentangling reasoning from
- 833 vision and language understanding. *Neural Information Processing Systems (NeurIPS)*, 2018-Decem, 1031–1042.
- 834 <http://nsvqa.csail.mit.edu>
- 835 Zhang, K. W., & Bowman, S. R. (2018). Language modeling teaches you more syntax than translation does: Lessons learned
- 836 through auxiliary task analysis. *EMNLP Workshop BlackboxNLP*, 359–361.
- 837 Zhuang, C., Kubilius, J., Hartmann, M. J., & Yamins, D. L. (2017). Toward Goal-Driven Neural Network Models for the Rodent
- 838 Whisker-Trigeminal System. *Neural Information Processing Systems (NIPS)*, 2555–2565.
- 839 [http://papers.nips.cc/paper/6849-toward-goal-driven-neural-network-models-for-the-rodent-whisker-trigeminal-](http://papers.nips.cc/paper/6849-toward-goal-driven-neural-network-models-for-the-rodent-whisker-trigeminal-system)
- 840 [system](http://papers.nips.cc/paper/6849-toward-goal-driven-neural-network-models-for-the-rodent-whisker-trigeminal-system)

841  
842

## 843 Methods

844 **1. Neural dataset 1: fMRI (Pereira2018).** We used the data from Pereira et al.'s (2018) Experiments 2 (n=9) and 3 (n=6) (10  
845 unique participants). (The set of participants is not identical to Pereira et al., 2018: i) one participant (tested at Princeton) was  
846 excluded from both experiments here to keep the fMRI scanner the same across participants; and ii) two participants who  
847 were excluded from Experiment 2 in Pereira et al., 2018, based on the decoding results in Experiment 1 of that study were  
848 included here, to err on the conservative side.) Stimuli for Experiment 2 consisted of 384 sentences (96 text passages, four  
849 sentences each), and stimuli for Experiment 3 consisted of 243 sentences (72 text passages, 3 or 4 sentences each). The two  
850 sets of materials were constructed independently, and each spanned a broad range of content areas. Sentences were 7-18  
851 words long in Experiment 2, and 5-20 words long in Experiment 3. The sentences were presented on the screen one at a time  
852 for 4s (followed by 4s of fixation, with additional 4s of fixation at the end of each passage), and each participant read each  
853 sentence three times, across independent scanning sessions (see Pereira et al., 2018 for details of experimental procedure  
854 and data acquisition).

855 *Preprocessing and response estimation:* Data preprocessing was carried out with SPM5 (using default parameters, unless  
856 specified otherwise) and supporting, custom MATLAB scripts. (Note that SPM was only used for preprocessing and basic  
857 modeling—aspects that have not changed much in later versions; for several datasets, we have directly compared the outputs  
858 of data preprocessed and modeled in SPM5 vs. SPM12, and the outputs were nearly identical.) Preprocessing included motion  
859 correction (realignment to the mean image of the first functional run using 2nd-degree b-spline interpolation), normalization  
860 (estimated for the mean image using trilinear interpolation), resampling into 2mm isotropic voxels, smoothing with a 4mm  
861 FWHM Gaussian filter and high-pass filtering at 200s. A standard mass univariate analysis was performed in SPM5 whereby a  
862 general linear model (GLM) estimated the response to each sentence in each run. These effects were modeled with a boxcar  
863 function convolved with the canonical Hemodynamic Response Function (HRF). The model also included first-order temporal  
864 derivatives of these effects (which were not used in the analyses), as well as nuisance regressors representing entire  
865 experimental runs and offline-estimated motion parameters.

866 *Functional localization:* Data analyses were performed on fMRI BOLD signals extracted from the bilateral fronto-temporal  
867 language network. This network was defined functionally in each participant using a well-validated language localizer task  
868 (Fedorenko et al., 2010), where participants read sentences vs. lists of nonwords. This contrast targets brain areas that  
869 support 'high-level' linguistic processing, past the perceptual (auditory/visual) analysis. Brain regions that this localizer  
870 identifies are robust to modality of presentation (e.g., Fedorenko et al., 2010; Scott et al., 2017), as well as materials and task  
871 (Diachek et al., 2020). Further, these regions have been shown to exhibit strong sensitivity to both lexico-semantic processing  
872 (understanding individual word meanings) and combinatorial, syntactic/semantic processing (putting words together into  
873 phrases and sentences) (Bautista & Wilson, 2016; I. Blank et al., 2016; I. A. Blank & Fedorenko, 2020; Fedorenko et al., 2010,  
874 2012, 2016, 2020). Following prior work, we used group-constrained, participant-specific functional localization (Fedorenko  
875 et al., 2010). Namely, individual activation maps for the target contrast (here, sentences>nonwords) were combined with  
876 "constraints" in the form of spatial 'masks'—corresponding to data-driven, large areas within which most participants in a  
877 large, independent sample show activation for the same contrast. The masks (available from <https://evlab.mit.edu/funcloc/>  
878 and used in many prior studies e.g., Jouravlev et al., 2019; Diachek et al., 2020; Shain et al., 2020) included six regions in each  
879 hemisphere: three in the frontal cortex (two in the inferior frontal gyrus, including its orbital portion: IFGorb, IFG; and one in  
880 the middle frontal gyrus: MFG), two in the anterior and posterior temporal cortex (AntTemp and PostTemp), and one in the  
881 angular gyrus (AngG). Within each mask, we selected 10% of most localizer-responsive voxels (voxels with the highest *t*-value  
882 for the localizer contrast) following the standard approach in prior work. This approach allows to pool data from the same  
883 functional regions across participants even when these regions do not align well spatially. Functional localization has been  
884 shown to be more sensitive and to have higher functional resolution (Niето-Castanon & Fedorenko, 2012) than the traditional  
885 group-averaging approach (Holmes & Friston, 1998), which assumes voxel-wise correspondence across participants. This is to  
886 be expected given the well-established inter-individual differences in the mapping of function to anatomy, especially  
887 pronounced in the association cortex (e.g., Frost & Goebel, 2012; Tahmasebi et al., 2012; Vazquez-Rodriguez et al., 2019).

888 We constructed a stimulus-response matrix for each of the two experiments by i) averaging the BOLD responses to each  
889 sentence in each experiment across the three repetitions, resulting in 1 data point per sentence per language-responsive  
890 voxel of each participant, selected as described above (13,553 voxels total across the 10 participants; 1,355 average,  $\pm 6$  std.  
891 dev.), and ii) concatenating all sentences (384 in Experiment 2 and 243 in Experiment 3), yielding a 384x12,195 matrix for  
892 Experiment 2, and a 243x8,121 matrix for Experiment 3.

893 To examine differences in neural predictivity between the language network and other parts of the brain, we additionally  
894 extracted fMRI BOLD signals from two other networks: the multiple demand (MD) network (Duncan, 2010; Fedorenko et al.,  
895 2013) and the default mode network (DMN) (Buckner et al., 2008; Buckner & DiNicola, 2019). These networks were also  
896 defined functionally using well-validated localizer contrasts (Fedorenko et al., 2013; Mineroff et al., 2018) using a similar  
897 procedure as the one used for defining the language network: combining a set of ‘masks’ with individual activation maps, and  
898 selecting top 10% of most localizer-responsive voxels within each mask. Both networks were defined using a spatial working  
899 memory task (Fedorenko et al., 2011, 2013). For the MD network, we used the hard>easy contrast, and for the DMN network,  
900 we used the fixation>hard contrast. As for the language network, the MD and DMN masks were derived from large sets of  
901 participants for those contrasts, and are also available at <https://evlab.mit.edu/funcloc/>. The MD network and the DMN  
902 included 29,936 (2,994±230) and 10,978 (1,098±7) voxels, respectively.

903

904 **2. Neural dataset 2: ECoG (Fedorenko2016).** We used the data from Fedorenko et al.’s (2016) study (n=5). (The set of  
905 participants includes one participant, S2, who was excluded from the main analyses in Fedorenko et al., 2016 due to a small  
906 number of electrodes of interest; because we here used only language-responsiveness as the criterion for electrode selection,  
907 this participant had enough electrodes to be included.) Stimuli consisted of 80 hand-constructed 8-word long semantically  
908 and syntactically diverse sentences and 80 lists of nonwords (as well as some other stimuli not used in the current study). For  
909 the critical analyses, we selected a set of 52 sentences that were presented to all participants. The materials were presented  
910 visually one word at a time (for 450 or 700 ms), and participants performed a memory probe task after each stimulus (see  
911 Fedorenko et al., 2016 for details of the experimental procedure and data acquisition).

912 *Preprocessing and response estimation:* We here provide only a brief summary, highlighting points of deviation from  
913 Fedorenko et al. (2016). The total numbers of implanted electrodes were 120, 128, 112, 134, and 98 for the five participants,  
914 respectively. Signals were digitized at 1200 Hz. Similar to Fedorenko et al. (2016), i) the recordings were high-pass filtered  
915 with a cut off frequency of 0.5 Hz; ii) reference, ground, and electrodes with high noise levels were removed, leaving 117,  
916 118, 92, 130, and 88 electrodes (for these analyses, we were more permissive with respect to noise levels compared to  
917 Fedorenko et al., 2016, to include as many electrodes in the analyses as possible; hence the numbers of analyzed electrodes  
918 are higher here than in the original study for 4 of the 5 participants); iii) spatially distributed noise common to all electrodes  
919 was removed using a common average reference spatial filter between electrodes with line noise smaller than a predefined  
920 threshold (electrodes connected to the same amplifier); and iv) a set of notch filters were used to remove the 60 Hz line noise  
921 and its harmonics. To extract the high gamma band activity—which has been shown to correspond to spiking neural activity  
922 in the vicinity of the electrodes (Buzsáki et al., 2012)—we used a gaussian filter bank with centers at 73, 79.5, 87.8, 96.9, 107,  
923 118.1, 130.4, and 144 Hz, and standard deviations of 4.68, 4.92, 5.17, 5.43, 5.7, 5.99, 6.3, and 6.62 Hz, respectively. This  
924 approach differs from Fedorenko et al. (2016), where an IIR band-pass filter was used to select frequencies in the range of  
925 70-170 Hz, and is likely more sensitive (Dichter et al. 2018). Finally, as in Fedorenko et al. (2016), the Hilbert transform was  
926 used to extract the analytic signal (Lawrence Marple, 1999) (except here, the average of the Hilbert signal across the eight  
927 filters was used as high-gamma signal), z-scored for each electrode with respect to the activity throughout the experiment,  
928 and the signal envelopes were downsampled to 300 Hz for further analysis (we did not additionally low-pass filter at 100 Hz,  
929 as in Fedorenko et al., 2016).

930 *Functional localization:* Mirroring the fMRI approach, where we focused on language-responsive voxels, data analyses were  
931 performed on signals extracted from language-responsive electrodes. These electrodes were defined in each participant using  
932 the same localizer contrast as in the fMRI datasets. In particular, we examined electrodes in which the envelope of the high  
933 gamma signal was significantly higher (at  $p < .01$ ) for trials of the sentence condition than the nonword-list condition (for  
934 details, see Fedorenko et al., 2016).

935 We constructed a stimulus-response matrix by i) averaging the z-scored high-gamma signal over the full presentation window  
936 of each word in each sentence, resulting in 8 data points per sentence per language-responsive electrode (97 electrodes total  
937 across the 5 participants; 47, 8, 9, 15, and 18 for participants S1 through S5, respectively), and ii) concatenating all words in  
938 all sentences (416 words across the 52 sentences), yielding a 416x97 matrix.



939 To examine differences in neural predictivity between language-responsive and other electrodes, we additionally extracted  
940 high gamma signals from a set of ‘stimulus-responsive’ electrodes. Stimulus-responsive electrodes were defined as electrodes  
941 in which the envelope of the high gamma signal for the sentence condition was significantly different (at  $p < 0.05$  by a paired-  
942 samples  $t$ -test) from the activity during the inter-trial fixation interval preceding the trial. This selection procedure resulted  
943 in 67, 35, 20, 29, and 26 electrodes. As expected, this set of electrodes included many of the language-responsive electrodes;  
944 for the analysis in SI-4, we exclude the language-responsive electrodes leaving 105 stimulus- (but not language-) responsive  
945 electrodes.

946 **3. Neural dataset 3: fMRI (Blank2014).** We used the data from Blank et al. (2014) ( $n=5$ ). (The set of participants includes 5 of  
947 the 10 participants in Blank et al., 2014, because we wanted each participant to have been exposed to the same materials  
948 and as many stories as possible; the 5 participants included here all heard eight stories.) Stimuli consisted of stories from the  
949 publicly available Natural Stories Corpus (Futrell et al., 2018). These stories, adapted from existing texts (fairy tales and short  
950 stories) were designed to be “deceptively naturalistic”: they contained an over-representation of rare words and syntactic  
951 constructions embedded in otherwise natural linguistic context. The stories were presented auditorily (each was ~5 min in  
952 duration), and following each story, participants answered 6 comprehension questions (see Blank et al., 2014 for details of  
953 the experimental procedure, data acquisition, and preprocessing).

954 *Functional localization:* As in the Pereira2018 dataset, data analyses were performed on fMRI BOLD signals extracted from  
955 the language network. From each language-responsive voxel of each participant, the BOLD time-series for each story was  
956 extracted. Across the eight stories, the BOLD time-series included 1,317 time-points (TRs, time of repetition;  $TR=2s$  and  
957 corresponds to the time it takes to acquire the full set of slices through the brain). To align the neuroimaging data with the  
958 story text, we first split the text into consecutive 2-second intervals (corresponding to the fMRI TRs) based on the auditory  
959 recording; if a word straddled boundaries of intervals, it was assigned to the 2s interval in which that spoken word ended.  
960 Each of the resulting intervals thus included a story “fragment”, which could be a full short sentence, part of a longer sentence,  
961 or a transition between the end of one sentence and the beginning of another. Due to the temporal resolution of the HRF,  
962 whose peak’s latency is 4-6 seconds, we assumed that each time-point in the BOLD signal represented activity elicited by the  
963 text fragment that occurred 4s (i.e., 2 TRs) earlier.

964 We constructed a stimulus-response matrix by i) averaging the BOLD signals corresponding to each TR in each story across  
965 the voxels within each ROI of each participant (averaging across the voxels within ROIs was done to increase the signal-to-  
966 noise ratio), resulting in 1 data point per TR per language-responsive ROI of each participant (60 ROIs total across the 5  
967 participants), and ii) concatenating all story fragments (1,317 ‘stimuli’), yielding a 1,317x60 matrix.

968

969 **4. Behavioral dataset: Self-paced reading (Futrell2018).** We used the data from Futrell et al. (2018) ( $n=179$ ). (The set of  
970 participants excludes 1 participant for whom data exclusions—see below—left only 6 data points or fewer.) Stimuli consisted  
971 of ten stories from the Natural Stories Corpus (same materials as those used in *Blank2014*, plus two additional stories), and  
972 any given participant read between 5 and all 10 stories. The stories were presented online (on Amazon’s Mechanical Turk  
973 platform) visually in a dashed moving window display—a standard approach in behavioral psycholinguistic research (Just et  
974 al., 1982). In this approach, participants press a button to reveal each consecutive word of the sentence or story; as they press  
975 the button again, the word they just saw gets converted to dashes again, and the next word is uncovered. The time between  
976 button presses provides an estimate of overall language comprehension difficulty, and has been shown to be robustly  
977 sensitive to both lexical and syntactic features of the stimuli (Grodner & Gibson, 2005; Smith & Levy, 2013, inter alia) (see  
978 Futrell et al., 2018 for details of the experimental procedure and data acquisition.) We followed data exclusion criteria in  
979 Futrell et al. (2018): for any given participant, we only included data for stories where they answered 5 or all 6 comprehension  
980 questions correctly, and we excluded reading times (RTs) that were shorter than 100 ms or longer than 3000 ms.

981

982 We constructed a stimulus-response matrix by i) obtaining the RTs for each word in each story for each participant (848,762  
983 RTs total across the 179 participants; 338 average,  $\pm 173$  std. dev.), and ii) concatenating all words in all sentences (10,256  
984 words across 485 sentences), yielding a 10,256x179 matrix.

985



986 **5. Computational models.** We tested 43 language models that were selected to sample a broad range of computational designs  
987 across three major types of architecture: embeddings, recurrent architectures, and attention-based ‘transformer’  
988 architectures. Here we provide a brief overview (see Table SI-10 for a summary of key features varying across the models).  
989 **GloVe** (Pennington et al., 2014) is a word embedding model where embeddings are positioned based on co-occurrence in the  
990 Common Crawl corpus; **ETM** (Dieng et al., 2019, 20ng dataset) combines word embeddings with an embedding of each word’s  
991 assigned topic; and **word2vec** (Mikolov et al., 2013)—abbreviated as w2v—provides embeddings which are trained to guess  
992 a word based on its context. **lm\_1b** (Jozefowicz et al., 2016) is a 2-layer long short-term memory (LSTM) model trained to  
993 predict the next word in the One Billion Word Benchmark (Chelba et al., 2014); and the **skip-thoughts** model (Kiros et al.,  
994 2015) is trained to reconstruct surrounding sentences in a passage. For all 38 transformer models (pretrained models from  
995 the HuggingFace library (Wolf et al., 2019)), we only evaluate the encoder and not the decoder; the encoders process long  
996 contexts (100s of words) with a deep neural network stack of multiple attention heads that operate in a feed-forward manner  
997 (except the Transformer-XL-wt103 and the two XLNet models, which use recurrent processing), and differ mostly in the choice  
998 of directionality, network architecture, and training corpora (Table SI-11). We highlight key features of different classes of  
999 transformer models (BERT, RoBERTa, XLM, XLM-RoBERTa, Transformer-XL-wt103, XLNet, CTRL, T5, ALBERT, and GPT) in the  
1000 order in which they appear in the bar-plots (e.g., Fig. 2a), except for the three ‘distilled’ models (Sanh et al., 2019), which we  
1001 mention in the end. **BERT** transformers (Devlin et al., 2018) (n=4; bert-base-uncased, bert-base-multilingual-cased, bert-large-  
1002 uncased, bert-large-uncased-whole-word-masking) are optimized to train bidirectional representations taking into account  
1003 context both to the left and right of a masked token. **RoBERTa** transformers (Liu et al., 2019) (n=2; roberta-base, roberta-  
1004 large) as a variation of BERT improve training hyper-parameters such as masking tokens dynamically instead of always  
1005 masking the same token. **XLM** models (Lample & Conneau, 2019) (n=7; xlm-mlm-enfr-1024, xlm-clm-enfr-1024, xlm-mlm-  
1006 xnli15-1024, xlm-mlm-100-1280, xlm-mlm-en2048) learn cross-lingual models by predicting the next (“clm”) or a masked  
1007 (“mlm”) token in a different language. **XLM-RoBERTa** (Conneau et al., 2019) (n=2; xlm-roberta-base, xlm-roberta-large)  
1008 combines RoBERTa masking with cross-lingual training in XLM. **Transformer-XL-wt103** (Dai et al., 2020) adds a recurrence  
1009 mechanism to GPT (see below) and trains on the smaller WikiText-103 corpus. **XLNet** transformers (Yang et al., 2019) (n=2;  
1010 xlnet-base-cased, xlnet-large-cased) permute tokens in a sentence to predict the next token. **CTRL** (Keskar et al., 2019) adds  
1011 control codes to GPT (see below) which influence text generation in a specific style. **T5** transformers (Raffel et al., 2019) (n=5;  
1012 t5-small, t5-base, t5-large, t5-3b, t5-11b) train the same model across a range of tasks including the prediction of multiple  
1013 corrupted tokens, GLUE (A. Wang, Singh, et al., 2019), and SuperGLUE (A. Wang, Pruksachatkun, et al., 2019) in a text-to-text  
1014 manner where the task is provided as a text prefix. **ALBERT** transformers (Lan et al., 2019) (n=8; albert-base-v1, albert-large-  
1015 v1, albert-xlarge-v1, albert-xxlarge-v1, albert-base-v2, albert-large-v2, albert-xlarge-v2, albert-xxlarge-v2) use parameter-  
1016 sharing and model inter-sentence coherence. **GPT** transformers (n=5) are trained to predict the next token in a large dataset  
1017 emphasizing document quality (openai-gpt (Radford et al., 2018) on the Book Corpus dataset, gpt2, gpt2-medium, gpt2-large,  
1018 and gpt2-xl (Radford et al., 2019) on WebText). Finally, **distilled versions** of models (Sanh et al., 2019) (n=3; distilbert-base-  
1019 uncased, distilgpt2, distilroberta-base) train compressed models on a larger teacher network.

1020  
1021 To retrieve model representations, we treated each model as an experimental participant (Figure 1) and ran the same  
1022 experiment on it that was run on humans. Specifically, sentences were fed in sequentially into the model (for Pereira2018,  
1023 Blank2014, and Futrell2018, sentences were grouped by topic / story to approximate the procedure with human participants).  
1024 For embedding and recurrent models, sentences were fed in word-by-word; for transformers, the context before (but not  
1025 after) each word was also fed into the models due to their lack of memory; the length of the context was determined by the  
1026 models’ architectures. For recurrent models, the memory was reset after each story (Pereira2018, Blank2014 and  
1027 Futrell2018), or each sentence (Fedorenko2016).

1028  
1029 After the processing of each word, we retrieved (“recorded”) model representations at every computational block (e.g., one  
1030 LSTM cell or one Transformer encoder block). (Word-by-word processing increases computational cost but is necessary to  
1031 avoid bidirectional models, like the BERT transformers, seeing the future.) When comparing against human recordings  
1032 spanning more than one word such as a sentence (Pereira2018) or story fragment (Blank2014), we aggregated model  
1033 representations: for the embedding models, we used the mean of the word representations; for recurrent and transformer  
1034 models, we used the representation of the last word since these models already aggregate representations of the preceding  
1035 context, up to a maximum context length of 512 tokens.

1036

1037 **6. Comparison of models to brain measurements.** We treated the model representation at each layer separately and tested  
1038 how well it could predict human recordings (for *Pereira2018*, we treated the two experiments separately, but averaged the  
1039 results across experiments for all plots except Fig. 2c). To generate predictions, we used 80% of the stimuli (sentences in  
1040 *Pereira2018*, words in *Fedorenko2016* and *Futrell2018*, and story fragments in *Blank2014*; Fig. 1) to fit a linear regression  
1041 from the corresponding 80% of model representations to the corresponding 80% of human recordings. We applied the  
1042 regression on model representations of the held-out 20% of stimuli to generate model predictions, which we then compared  
1043 against the held-out 20% of human recordings with a Pearson correlation. This process was repeated five times, leaving out  
1044 different 20% of stimuli each time, and we computed the per-voxel/electrode/ROI mean predictivity across those five splits.  
1045 We aggregated these per-voxel/electrode/ROI scores by taking the median of scores for each participant's  
1046 voxels/electrodes/ROIs and then computing the median and median absolute deviation (m.a.d.) across participants (over  
1047 per-participant scores). Finally, this score was divided by the estimated ceiling value (see [Estimation of ceiling](#) below) to yield  
1048 a final score in the range of [0, 1]. We report the results for the best-performing layer for each model (SI-12) but controlled  
1049 for the generality of layer choices in train/test splits (Fig. S2b,c).

1050 **7. Estimation of ceiling.** Due to intrinsic noise in biological measurements, we estimated a ceiling value to reflect how well  
1051 the best possible model of an average human could perform. To do so, we first subsampled—for each dataset separately—  
1052 the data with  $n$  recorded participants into all possible combinations of  $s$  participants for all  $s \in [2, n]$  (e.g. {2, 3, 4, 5} for  
1053 *Fedorenko2016* with  $n=5$  participants). For each subsample  $s$ , we then designated a random participant as the target that we  
1054 attempt to predict from the remaining  $s - 1$  participants (e.g., predict 1 subject from 1 (other) subject, 1 from 2 subjects, ...,  
1055 1 from 4, to obtain a mean score for each voxel/electrode/ROI in that subsample. To extrapolate to infinitely many humans  
1056 and thus to obtain the highest possible (most conservative) estimate, we fit the equation  $v = v_0 \times \left(1 - e^{-\frac{x}{\tau_0}}\right)$  where  $x$  is  
1057 each subsample's number of participants,  $v$  is each subsample's correlation score and  $v_0$  and  $\tau_0$  are the fitted parameters for  
1058 asymptote and slope respectively. This fitting was performed for each voxel/electrode/ROI independently with 100  
1059 bootstraps each to estimate the variance where each bootstrap draws  $x$  and  $v$  with replacement. The final ceiling value was  
1060 the median of the per-voxel/electrode/ROI ceilings  $v_0$ .  
1061 For *Fedorenko2016*, a ceiling was estimated for each electrode in each participant, so each electrode's raw value was divided  
1062 by its own ceiling value. Similarly, for *Blank2014*, a ceiling was estimated for each ROI in each participant, so each ROI's raw  
1063 value was divided by its own ceiling value. For *Pereira2018*, we treated the two experiments separately, focusing on the 5  
1064 participants that completed both experiments to obtain full overlap in the materials for each participant, and used 10 random  
1065 sub-samples to keep the computational cost manageable. A ceiling was estimated for all voxels in the 5 participants who  
1066 participated in both experiments. Each voxel's raw predictivity value was divided by the average ceiling estimate (across all  
1067 the voxels for which it was estimated). For *Futrell2018*, given the large number of participants and because most participants  
1068 only had measurements for a subset of the stimuli, we did not hold out one participant but rather tested how well the mean  
1069 RTs for one half of the participants predicted the RTs for the other half of participants. We further took 5 random subsamples  
1070 at every 5 participants, starting from 1, and built 3 random split-halves, again to keep computational cost manageable. A  
1071 ceiling was estimated for each participant, and each participant's raw values were divided by this ceiling. (Note that this  
1072 approach is even more conservative than the leave-one-out approach, because split-half correlations tend to be higher than  
1073 one-vs.-rest, due to a reduction in noise when averaging (for each half).)

1074  
1075 **8. Language Modeling.** To assess the models' performance on the normative next-word-prediction task, we used a dataset  
1076 of 720 Wikipedia articles, WikiText-2 (Merity et al., 2016), with 2M training, 218k validation, and 246k test tokens (words  
1077 and word-parts). These tokens were processed by model-specific tokenization with a maximum vocabulary size of 250k,  
1078 selected based on the tokens' frequency in the model's original training dataset, and split up into blocks of 32 tokens each  
1079 (both the vocabulary size and the length of blocks were constrained by computational cost limitations). We sequentially fed  
1080 the tokens into models as explained in [Methods 5 \(Computational Models\)](#) and captured representations at each step from  
1081 each model's final layer (penultimate layer before the classifier if the model has a readout). To predict the next word, we fit  
1082 a linear decoder from those representations to the next token over words in the vocabulary ( $n=50k$ ), on the training tokens.

1083 This decoder is trained with a cross-entropy-loss  $L = -\sum_c t_c^i \log\left(\frac{e^{s_c^i}}{\sum_d e^{s_d^i}}\right)$  where  $t_c^i$  is the true label for class  $c$  and sample  
1084  $i$ , and  $s_c^i$  is the predicted probability of that class; the linear weights are updated with AdamW and a learning rate of  $5e-5$  in

1085 batches of 4 blocks until convergence as defined on the validation set. Importantly, note that we only trained weights of a  
1086 readout decoder, *not* the weights of models themselves, in order to maintain the same model representations that we used  
1087 in model-to-brain and model-to-behavior comparisons. The final language modeling score is reported for each model as the  
1088 perplexity, i.e. the exponent of the cross-entropy loss, on the held-out test set. We ensured that our pipeline could  
1089 reproduce the lower perplexity values in e.g. (Radford et al., 2019) by fine-tuning the entire model and increasing the batch  
1090 size. To be able to test all models under the same conditions and with fixed representations that were used for brain  
1091 prediction, we however had to use a lower batch size and only train a linear readout without fine-tuning which leads to the  
1092 lower perplexity scores reported in Fig. 3. T5-11b is not part of this analysis because of lack of computational resources to  
1093 run the model.

1094  
1095 **9. Statistical tests.** As a primary metric, model-to-brain predictivity scores are reported as the Pearson correlation coefficient  
1096 (denoted by “*r*”). These correlation scores were obtained from aggregating over individual per-voxel/electrode/ROI scores.  
1097 To avoid the assumption that the neural scores are Gaussian distributed, we aggregated these per-voxel/electrode/ROI scores  
1098 by taking the *median* of scores for each participant’s voxels/electrodes/ROIs and then computing the median and median  
1099 absolute deviation (m.a.d.) across participants.

1100 In addition to reporting an aggregated score across datasets, we show individual scores per dataset (visualized as bar plot  
1101 insets). To obtain an error estimate for the correlation scores, we report the bootstrapped correlation coefficient, as  
1102 computed by leaving out 10% of the scores and computing the r-value on the remaining 90% held-out scores (over 1,000  
1103 iterations).

1104 All p-values less than 0.05 are summarized with one asterisk, p-values less than 0.005 with two asterisks, p-values less than  
1105 0.0005 with three asterisks, and p-values less than 0.00005 are denoted by four asterisks.

1106 For interaction tests, we used two-sided t-tests with 1,000 bootstraps and 90% of samples per bootstrap.

1107  
1108

1109 **Author contributions:**

1110 M.S. and J.T. conceived of the project.

1111 M.S., I.B., G.T., C.K., N.K., J.T. and E.F. developed analyses.

1112 I.B., G.T., M.S., C.K., E.H. and E.F. analyzed neural and behavioral data.

1113 M.S., C.K. and G.T. implemented models.

1114 M.S. and C.K. implemented language modeling and GLUE benchmarks.

1115 M.S., G.T. and C. K. carried out analyses to relate model representations to neural and behavioral data.

1116 M.S., I.B., G.T., C.K., E.H., N.K., J.T. and E.F. discussed results.

1117 M.S., I.B., G.T., C.K., N.K., J.T. and E.F. contributed to the manuscript.

1118

1119 **Acknowledgments:** We would like to thank Roger Levy, Steve Piantadosi, Cory Shain, Noga Zaslavsky, Antoine Bosselut, and  
1120 Jacob Andreas for comments on the manuscript, Tiago Marques for comments on ceiling estimates and feature analysis, Jon  
1121 Gauthier for comments on language modeling, Bruce Fischl and Ruopeng Wang for adding a Freeview functionality. MS was  
1122 supported by a Takeda Fellowship, the Massachusetts Institute of Technology Shoemaker Fellowship, and the SRC  
1123 Semiconductor Research Corporation. GT was supported by the MIT Media Lab Consortia and the Massachusetts Institute  
1124 of Technology Singleton Fellowship. CK was funded by the Massachusetts Institute of Technology Presidential Graduate  
1125 Fellowship. EH was supported by the Friends of the McGovern Institute Fellowship. NK and JT were supported by the Center  
1126 for Brains, Minds, and Machines (CBMM), funded by NSF STC CCF-1231216. EF was supported by NIH awards R01-DC016607  
1127 and R01-DC016950, and by funds from the Brain and Cognitive Sciences Department and the McGovern Institute for Brain  
1128 Research at MIT.

1129

# Supplement

1130

**S1:** Ceiling estimates for neural and behavioral datasets

1131

**S2:** Scores generalize across metrics and layers

1132

**S3:** Brain surface visualization of model predictivity scores

1133

**S4:** Language specificity

1134

**S5:** Model performance on diverse language tasks vs. model-to-brain fit

1135

**S6:** Model's neural predictivity for each dataset is correlated with behavioral predictivity

1136

**S7:** Performance on next-word prediction selectively predicts model-to-behavior fit.

1137

**S8:** Model architecture contributes to brain predictivity and untrained performance predicts trained performance

1138

**S9:** Controls for untrained models

1139

**S10:** Effects of model architecture and training on neural and behavioral scores

1140

**S11:** Overview of model designs

1141

**S12:** Distribution of layer preference (best performing layer) per voxel for GPT2-xl for *Pereira2018*

1142

1143

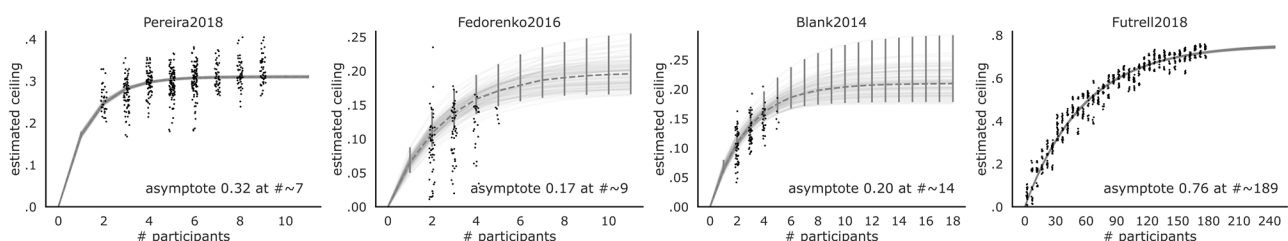

1144

**Figure S1: Ceiling estimates for neural and behavioral datasets.** Due to intrinsic noise in biological measurements, we estimated a ceiling value to reflect how well the best possible model of an average human could perform, based on sub-samples of the total set of participants (see [Methods-7](#)). For each sub-sample,  $s - 1$  participants are used to predict a held-out participant (except in *Futrell2018*, where this is done on split-halves, as described in the text). Each dot represents a correlation between the average scores of the  $s - 1$  participants and the left-out participant for a random sub-sample of the number of participants  $s$  indicated on the x-axis. We then bootstrapped 100 random combinations of those dots to extrapolate (gray lines) the highest possible ceiling if we had an infinite number of participants at our disposal. The parameters of these bootstraps are then aggregated by taking the median to compute an overall estimated ceiling (dashed gray line with 95% CI in error-bars). We use this estimated ceiling to normalize model scores and here also report the number of participants at which the estimated ceiling would be met (which show that for *Pereira2018* and *Futrell2018*, the number of participants we have is at and close to the asymptote value, respectively). Ceiling levels are .32 (*Pereira2018*), .17 (*Fedorenko2016*), .20 (*Blank2014*), and .76 (*Futrell2018*).

1156

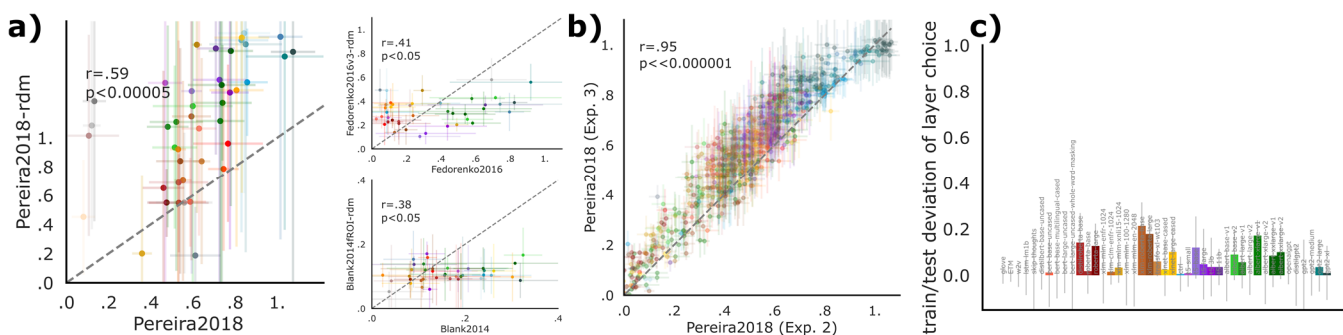

1157

**Figure S2: Scores generalize across metrics and layers.** **a)** Model scores on each dataset generalize across different choices of a similarity metric; here we plot the predictivity metric used in the manuscript on the x-axis against a model-to-brain

1158



1159 similarity metric based on representational dissimilarity matrices (RDMs) between models and neural representations on the  
1160 y-axis. Like in the predictivity metric, stimuli along with corresponding model activations and brain recordings were split 5-  
1161 fold but we then only compared the respective test splits given that the RDM metric does not employ fitting. Specifically, we  
1162 followed (Kriegeskorte, 2008) and computed the RDM for each model's activations, and a separate RDM for each brain  
1163 recording dataset, based on 1 minus the Pearson correlation coefficient between pairs of stimuli; then, we measured model-  
1164 brain similarity via Spearman correlation across the two RDMs' upper triangles. The RDM score for one model on one human  
1165 dataset is then the mean over splits. We ran each model and compared resulting scores with the primarily used scores from  
1166 the predictivity metric. Correlations for models' scores between the predictivity and the RDM metrics are: Pereira2018  $r=.57$ ,  
1167  $p<0.0001$ ; Fedorenko2016  $r=.40$ ,  $p<.01$ ; Blank2014  $r=.38$ ,  $p<.05$ . **b)** Model scores per layer generalize across dataset splits; for  
1168 every layer in each model we plot its brain score (using the predictivity metric) on two experimental splits (experiment 2 and  
1169 3) of the *Pereira2018* dataset. Scores are very strongly correlated ( $r=.95$ ,  $p<<0.000001$ ), indicating that choosing a model's  
1170 layer on a separate dataset split will generalize to a held-out test split. **c)** Choice of layer generalizes across dataset splits; for  
1171 each model we plot the difference between its score on *Pereira2018* experiment 3 when choosing the layer on experiment 3  
1172 directly (i.e. the max due to layer choice on "test set") and its score on experiment 3 when choosing the layer on experiment  
1173 2 (choice on "train set"). The layer is chosen based on the model's maximum score across layers on the respective dataset  
1174 split. Deviations between choosing the layer on a train or test set are minimal with error bars overlapping 0, indicating that  
1175 there is no substantial difference between the two choices.  
1176

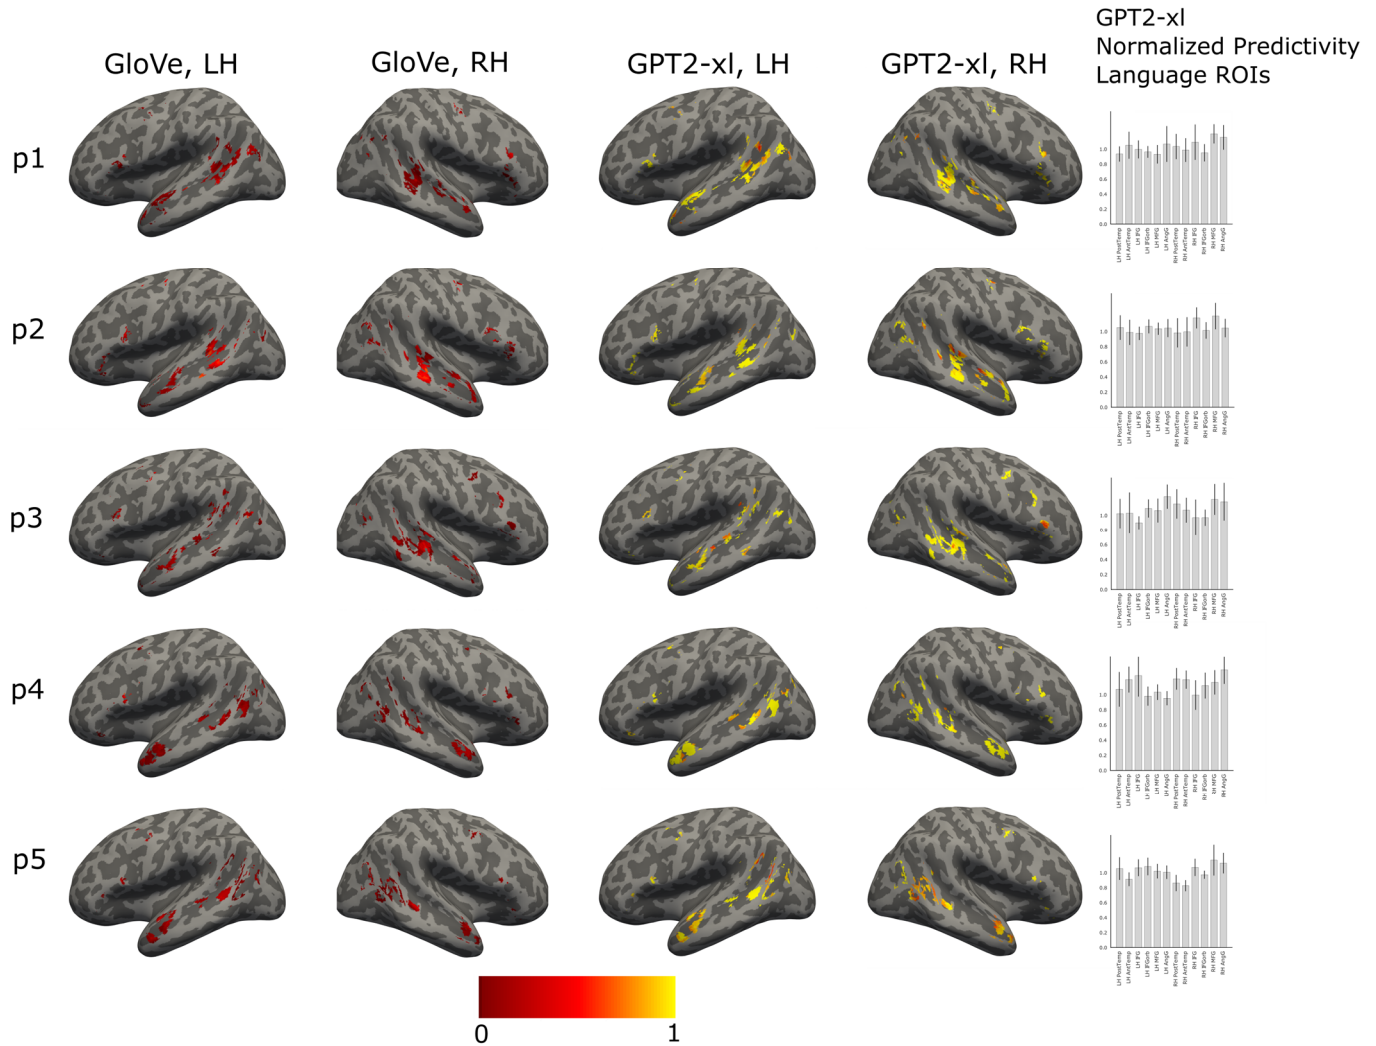

1177 Figure S3: **Brain surface visualization of model predictivity scores.** Plots show surface projections of volumetric individual  
 1178 language-responsive functional ROIs in the left and right hemispheres (LH and RH) for five representative participants from  
 1179 *Pereira2018*. In each voxel of each fROI, we show a normalized predictivity value for two models that differ substantially in  
 1180 their ability to predict human data: GloVe (first two columns) and GPT2-xl (second two columns; for GPT2-xl, we show  
 1181 predictivity values from the overall best-performing layer, in line with how we report the results in the main text). (Note that  
 1182 the voxel locations are identical between GloVe and GPT2-xl, and are determined by an independent functional language  
 1183 localizer as described in the text; we here illustrate the differences in predictivity values, along with showing sample fROIs  
 1184 used in our analyses). Predictivity values were ceiling-normalized for each participant and each of 12 ROIs separately (a slight  
 1185 deviation from the approach in the main analysis, which was designed to control for between-region differences in reliability).  
 1186 The data were analyzed in the volume space and co-registered using SPM12 to Freesurfer's standard brain CVS35 (combined  
 1187 volumetric and surface-based (CVS)) in the MNI152 space using nearest neighbor interpolation and no smoothing. The ceiled  
 1188 predictivity maps for the language localizer contrast (10% of most language-responsive voxels in each 'mask'; [Methods-1](#))  
 1189 were projected onto the cortical surface using `mri_vol2surf` in Freesurfer v6.0.0 with a projection fraction of 1. The surface  
 1190 projections were visualized on an inflated brain in the MNI152 space using the developer version of Freeview (assembly March  
 1191 10th, 2020). The bar plots in the rightmost column show the normalized predictivity values per ROI (median across voxels) in  
 1192 the language network for GPT2-xl. Error bars denote m.a.d. across voxels. The distribution of predictivity values across the  
 1193 language-responsive voxels, and the similar predictivity magnitudes across the ROIs in the bar graphs, both suggest that the  
 1194 results (between-model differences in neural scores) are not driven by one particular region of the language network, but are  
 1195 similar across regions, and between the LH and RH components of the network (see also SI-4).  
 1196

#### 1197 **SI-4 – Language specificity**

1198 In the analyses reported in the manuscript, we focused on the language-responsive regions / electrodes. Here, for two  
1199 datasets, we investigated the model-brain relationship outside the language network in order to assess the spatial specificity  
1200 of our results, i.e., to test whether they obtain only, or more strongly, in the language network compared to other parts of  
1201 the brain. For both datasets, we report analyses based on *raw predictivity values*, without normalizing by the estimated noise  
1202 ceiling because the brain regions of the language network differ from other parts of the brain in how strongly their activity is  
1203 tied to stimulus properties during comprehension (e.g., I. A. Blank & Fedorenko, 2017, 2020; Diachek et al., 2020; Shain et al.,  
1204 2020; Wehbe et al., 2020). This variability is important to take into account when comparing between functionally different  
1205 brain regions/electrodes because we are interested in how well the models explain linguistic-stimulus-related neural activity.  
1206 When we normalize the neural responses of a non-language-responsive region/electrode using a language comprehension  
1207 task, we're effectively isolating whatever little *stimulus-related activity* this region/electrode may exhibit, putting them on  
1208 ~equal or similar footing with the language-responsive regions/electrodes. (For completeness and ease of comparison with  
1209 the main analyses, we also report analyses based on normalized predictivity values.)  
1210

1211 **Fedorenko2016:** The scores obtained from language-responsive electrodes were compared to those obtained from stimulus-  
1212 responsive electrodes, excluding the language-responsive ones (see [Methods-2](#)), for all 43 models. The number of language-  
1213 responsive electrodes across five participants was 97, and the number of stimulus-, but not language-, responsive electrodes  
1214 across the participants was comparable (n=105). The analysis was identical to the main analysis (see [Methods](#)), besides  
1215 omitting the ceiling normalization for the raw predictivity analyses. As described in Methods, normalization was performed  
1216 for each electrode in each participant separately.

1217 For raw predictivity, neural responses in the language-responsive electrodes were predicted 49.21% better on average across  
1218 models than the non-language-responsive electrodes (independent-samples two-tailed t-test:  $t=3.4$ ,  $p=0.001$ ). (For  
1219 normalized predictivity, neural responses in the language-responsive electrodes were predicted 59.26% better on average  
1220 across models than the non-language-responsive electrodes ( $t=2.24$ ,  $p=0.03$ ).)  
1221

1222 **Pereira2018:** The scores obtained from the language network were compared to those obtained from two control networks:  
1223 the multiple demand (MD) network and the default mode network (DMN) (see [Methods](#)), for all 43 models. The number of  
1224 voxels in the language network across participants was, on average, 1,355 ( $\pm 7$  SD across participants), and the average  
1225 number of voxels in the MD network and the DMN was comparable (MD:  $2,994\pm 230$ ; DMN:  $1,098\pm 7$ ). The analysis was  
1226 identical to the main analysis (see [Methods](#)), besides omitting the ceiling normalization for the raw predictivity analyses. For  
1227 the normalized predictivity analyses, the network predictivity values were normalized by their respective network ceiling  
1228 values.

1229 For raw predictivity, neural responses in the language network ROIs were predicted 16.96% better on average across models  
1230 than the MD network ROIs (independent-samples two-tailed t-test:  $t=2.26$ ,  $p=0.03$ ) and numerically (14.33%) better than the  
1231 DMN ROIs ( $t=1.78$ ,  $p=0.08$ ). (For normalized predictivity, neural responses in the language network ROIs were predicted  
1232 numerically (6.47%) worse on average than the MD network ROIs ( $t=-0.92$ ,  $p=0.36$ ) and also numerically (1.05%) worse than  
1233 the DMN ROIs ( $t=-0.31$ ,  $p=0.76$ ).)  
1234

1235 These results suggest that—when allowing for inter-regional differences in the reliability of language-related responses—the  
1236 model-to-brain relationship is stronger in the language-responsive regions/electrodes. However, we leave open the possibility  
1237 that language models also explain neural responses outside the boundaries of the language network, perhaps because these  
1238 models capture some parts of our general semantic knowledge, which is plausibly stored in a distributed fashion across the  
1239 brain. For example, several earlier studies used simple embedding models to decode linguistic meaning from fMRI data (e.g.,  
1240 Wehbe et al., 2014; Huth et al., 2016; Anderson et al., 2017; Pereira et al., 2018) and reported reliable decoding not only  
1241 within the language network, but also across other parts of association cortex. Given that we know that different large-scale  
1242 cortical networks differ functionally in important ways (e.g., see Fedorenko & Blank, 2020, for a recent discussion of the  
1243 language vs. MD networks), it will be important to investigate in future work the precise mapping between the language  
1244 models' representations and neural responses in these different functional networks.  
1245

## 1246 **SI-5 – Model performance on diverse language tasks vs. model-to-brain fit**

1247 To test whether the next-word prediction task is special in predicting model-to-brain fit, we used the *Pereira2018* dataset to  
1248 examine the relationship between the models' performance on diverse language processing tasks from the General Language  
1249 Understanding Evaluation (GLUE) benchmarks (Wang et al., 2018) and neural predictivity. We used a subset of the high-  
1250 performing, transformer models (n=30 of the 38 where we could find published commitments of which features to use for  
1251 GLUE). The GLUE benchmark encompasses nine tasks that can be classified into three categories: single-sentence judgment  
1252 tasks (n=2), sentence-pair semantic similarity judgment tasks (n=3), and sentence-pair inference tasks (n=4). The two single-  
1253 sentence tasks are both binary classification tasks: models are asked to determine whether a given sentence is grammatical  
1254 or ungrammatical (Corpus of Linguistic Acceptability, *CoLA* (Warstadt et al., 2018)), or whether the sentiment of a sentence  
1255 is positive or negative (Stanford Sentiment Treebank, *SST-2* (Socher et al., 2013)). In the semantic similarity tasks, models are  
1256 asked to assert or deny the semantic equivalence of question pairs (Quora Question Pairs, *QQP* (Chen et al., 2018)) or sentence  
1257 pairs (Microsoft Research Paraphrase Corpus, *MRPC* (Dolan & Brockett, 2005)), or to judge the degree of semantic similarity  
1258 between two sentences on a scale of 1-5 (Semantic Textual Similarity Benchmark, *STS-B* (Cer et al., 2017)). Lastly, the  
1259 benchmark contains four inference tasks, of which we include three (following Devlin et al., 2018), we exclude the Winograd  
1260 Natural Language Inference, *WNLI*, task; see (12) in <https://gluebenchmark.com/faq>). In two of these tasks, models are asked  
1261 to determine the entailment relationship between sentences in a pair using either tertiary classification: entailment,  
1262 contradiction, neutral (Multi-Genre Natural Language Inference corpus, *MNLI* (Williams et al., 2018)), or binary classification:  
1263 entailment or no entailment (Recognizing Textual Entailment, *RTE* (Dagan et al., 2006, Bar Haim et al., 2006, Giampiccolo et  
1264 al., 2007, Bentivogli et al., 2009)). And in the third inference task, the Question Natural Language Inference, *QNLI*, task  
1265 (Rajpurkar et al., 2016, White et al., 2017, Demszky et al., 2018), models are presented with question-answer pairs and asked  
1266 to decide whether or not the answer-sentence contains the answer to the question.

1267 In order to evaluate model performance on GLUE benchmark tasks, each GLUE dataset was first converted into a format that  
1268 is compatible with transformer model input using functionality from the GLUE data processor provided by Huggingface  
1269 transformers (<https://huggingface.co/transformers/>). In particular, each set of materials is represented as a matrix that  
1270 includes the following dimensions: item (and sentence for multi-sentence materials) ID, ID for each individual word (with  
1271 reference to the vocabulary used by the transformer models), the label (e.g., grammatical vs. ungrammatical), and the  
1272 'attention mask' which specifies which part(s) of the sentences the model should pay attention to (e.g., some 'padding' is  
1273 commonly used to equalize the lengths of sentences/items to the target length of 128 tokens (again constrained by  
1274 computational cost), and the attention mask is set to include only the actual words in the materials, and not the padding, and  
1275 in some models to further constrain which parts of the input to attend to—e.g., in GPT2 models, the rightward context is  
1276 ignored). Next, each GLUE dataset was then fed into each model to obtain a sequence of hidden states at the output of the  
1277 last layer of the model. Following default settings from Huggingface transformers, from these hidden states, we then  
1278 extracted the token of interest: for bidirectional models such as BERT, this was the first input token—a special token ([cls])  
1279 that is prepended to each item and designed for sequence classification tasks, and for unidirectional models such as GPT-2,  
1280 XLNet or CTRL, this token corresponded to the last attended token (e.g., the last word/word-part in the sentence). In order  
1281 to ensure a fair comparison between the models and to avoid the skewing of representations by individual task pre-training,  
1282 dense linear pooling projection layers (specific to some transformer) are disregarded. Finally, we fit a linear decoder from the  
1283 features of the extracted tokens of interest to the task label(s). For tasks with two or more labels, a cross-entropy loss function  
1284 is used; for the task that uses a rating scale, the decoder is trained with a mean-square error (MSE) loss function. Similar to  
1285 the next-word prediction task, the linear weights are updated with the AdamW optimizer and a learning rate of 5e-5 in batches  
1286 of 8 blocks until convergence as defined on the validation set. Importantly, and also similar to the next-word-prediction task,  
1287 we only trained weights of a readout decoder, *not* the weights of models themselves, in order to maintain the same model  
1288 representations that we used in model-to-brain and model-to-behavior comparisons. To account for potential bias in the  
1289 GLUE datasets, multiple metrics within tasks, as well as different metrics across tasks are reported in the GLUE benchmark.  
1290 Following standards in the field, we follow GLUE evaluation metrics (A. Wang, Singh, et al., 2019) and report the final task  
1291 score as accuracy for *SST-2*, *MNLI*, *RTE*, and *QNLI*, Matthew's Correlation for *CoLA*, the average of accuracy and F1 score for



1292 MRPC, and QQP, and the average of Pearson and Spearman correlation for *STS-B*. The results are shown in Fig. S5. None of  
 1293 the tasks significantly predicted neural scores, suggesting that next-word prediction may be special in its ability to predict  
 1294 brain-like processing. As with language modeling, we were unable to evaluate T5-11b on these benchmarks due to lack of  
 1295 computational resources.  
 1296

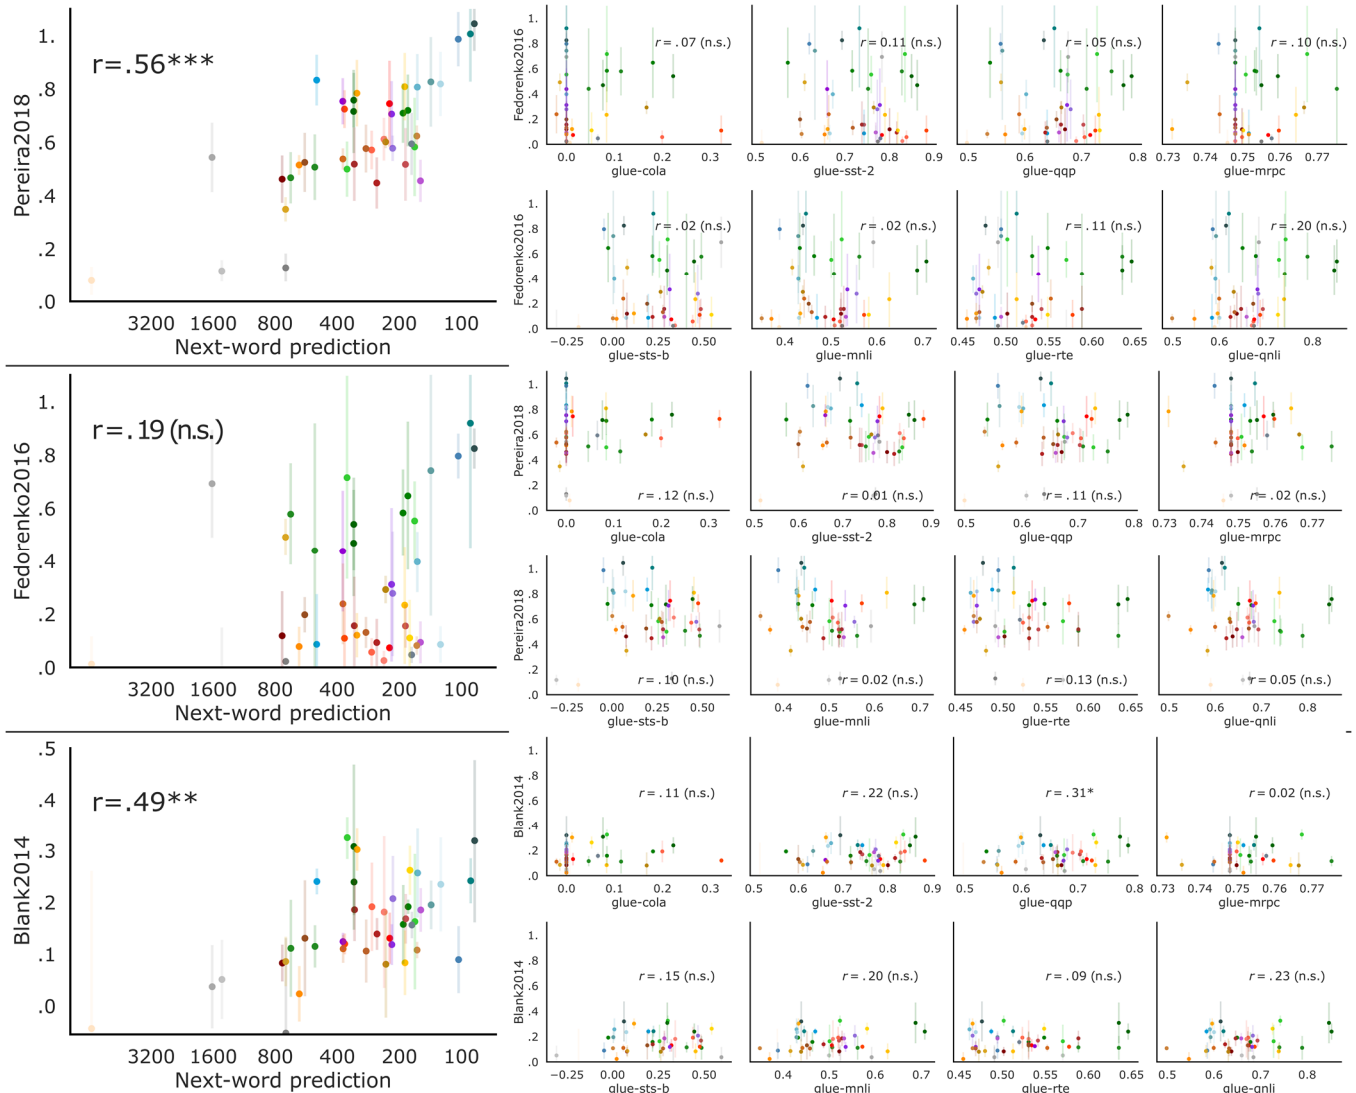

1297 Figure S5: **Performance on next-word prediction selectively predicts model-to-brain fit.** Performance on GLUE tasks was  
 1298 evaluated as described in SI-5. Only the next-word prediction correlations but none of the GLUE correlations were significant.  
 1299

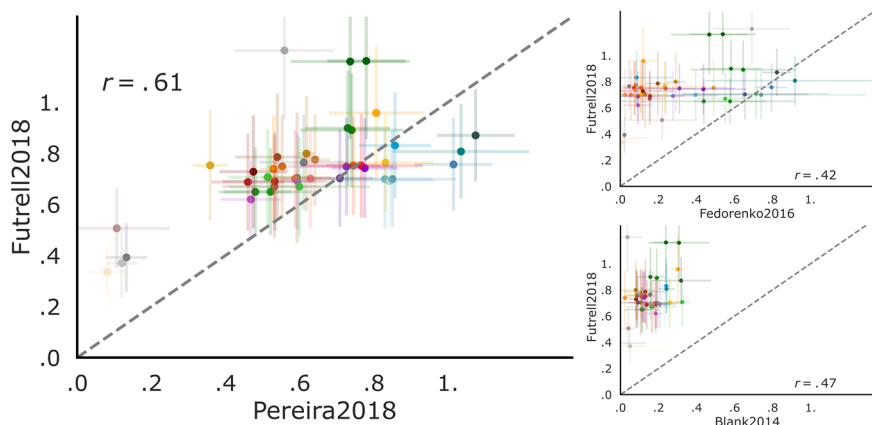

1300 Figure S6: **Models' neural predictivity for each dataset is correlated with behavioral predictivity.** In Fig. 4b, we showed that  
 1301 the models' neural predictivity (averaged across the three neural datasets: Pereira2018, Fedorenko2016, Blank2014)  
 1302 correlates with behavioral predictivity. Here, we show that this relationship also holds for each neural dataset individually:  
 1303 Pereira2018:  $p < 0.0001$ , Fedorenko2016:  $p < 0.01$ , Blank2014:  $p < 0.01$ .

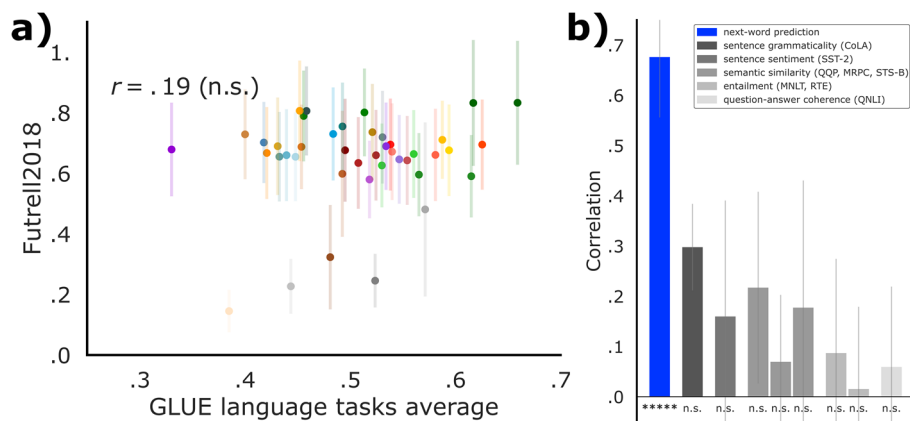

1304 Figure S7: **Performance on GLUE tasks does not predict model-to-behavior fit.** In Fig. 4c, we showed a significant positive  
 1305 correlation of next-word prediction performance with predictivity on behavioral reading times. Here we test whether  
 1306 performance on GLUE tasks predicts behavioral scores (performance on GLUE tasks was evaluated as described in SI-5). Only  
 1307 the next-word prediction correlations but none of the GLUE correlations were significant. Notations as in Figure 3 for the  
 1308 GLUE average (a) and individual tasks (b).

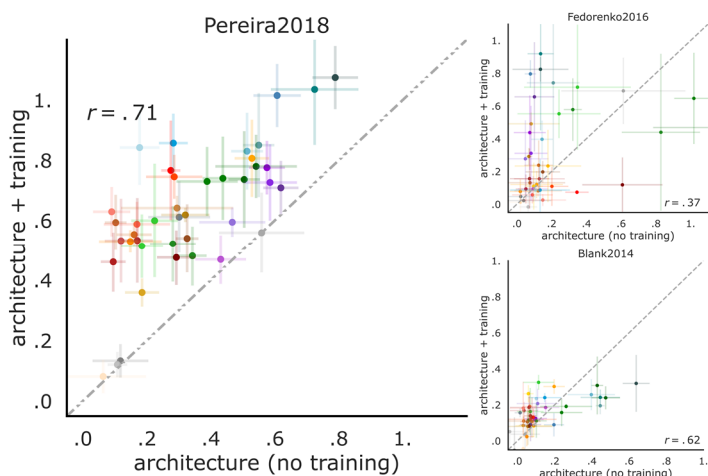

1309 Figure S8: **Model architecture contributes to brain predictivity and untrained performance predicts trained performance.**  
 1310 In Fig. 5, we showed that untrained models already achieve robust brain predictivity (averaged across the three neural and  
 1311 one behavioral datasets). Here, we show that this relationship also holds for each dataset individually: Pereira2018:  
 1312  $p < 0.00001$ , Fedorenko2016:  $p < 0.05$ , Blank2014:  $p < 0.00001$ .

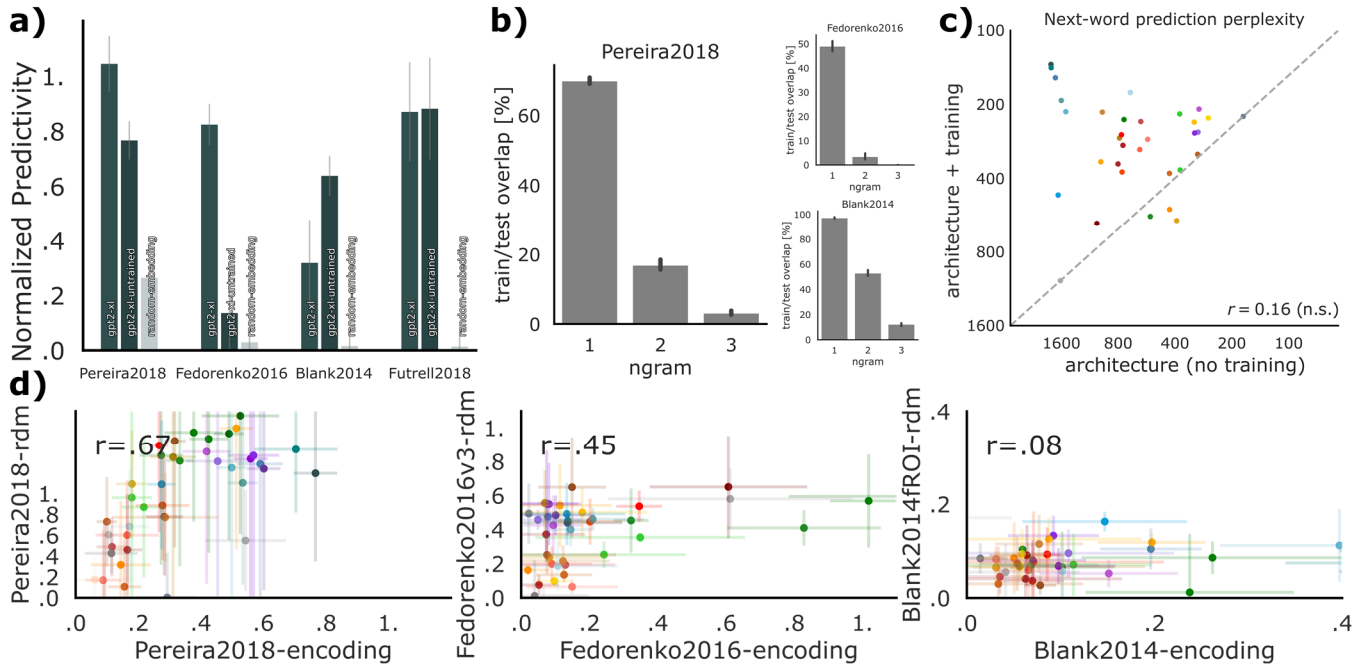

1313 Figure S9: **Controls for untrained models.** **a)** Neural and behavioral scores of GPT2-xl, the best-performing model, with vs.  
 1314 without training, and of a random embedding of the same size. A large feature size alone is not sufficient: a random  
 1315 embedding matched in size to GPT2-xl scores worse than untrained GPT2-xl in all four datasets (3 neural, and 1 behavioral).  
 1316 These results suggest that model architecture critically contributes to model-to-brain and model-to-behavior fits. **b)** Overlap  
 1317 of bi- and tri-grams in train/test stimuli splits of benchmarks is minimal, and despite single-word overlap memorization of  
 1318 per-word responses is insufficient (a). **c)** The relationship between model performance with vs. without training on the  
 1319 wikitext-2 next-word-prediction task. Consistent with model performance with vs. without training on neural and behavioral  
 1320 datasets (Fig. 5), untrained models perform reasonably well. Training improves scores by 80% on average, and most  
 1321 prominently for GPT models, in teal (where the quality of the training data is optimized; see [Computational models](#) in  
 1322 [Methods](#)). GPT's poor performance on next-word prediction might be explained by very high representational similarities  
 1323 across words pre-training in its last layer (Ethayarajh, 2019). **d)** Scores for untrained models obtained via linear predictivity  
 1324 generalize to scores obtained via RDM correlations. The RDM metric does not use any fitting. Correlations for untrained  
 1325 models' scores between the predictivity and the RDM metric are: Pereira2018  $r = .67$ ,  $p < 0.000005$ ; Fedorenko2016  $r = .45$ ,  
 1326  $p < .005$ ; Blank2014  $r = .08$ , n.s. See Fig. S2 for details on the RDM metric.

1327  
 1328 **SI-10 – Effects of model architecture and training on neural and behavioral scores**  
 1329

1330 The 43 language models included in the current study span three major types of architecture: embedding models, recurrent  
 1331 models, and attention-based transformer architectures. However, in addition to this coarse distinction, the individual models  
 1332 vary widely in diverse architectural and training features. A rigorous examination of the effects of different model features  
 1333 on model-to-brain/behavior fit would require careful pairwise comparisons of minimally different models, which is not  
 1334 possible for 'off-the-shelf' models without extremely expensive re-training from scratch under many/all possible  
 1335 combinations of architecture, training diet, optimization objective, and other hyper-parameters. However, we here undertook  
 1336 a preliminary exploratory investigation. In particular, for a subset of model features (Table SI-9), we computed a Pearson  
 1337 correlation between the feature values and the averaged model score across all four datasets (3 neural, and 1 behavioral).  
 1338 We included five architectural features. Three features were continuous: i) number of hidden layers, which varied between 1

1339 and 48 (mean 16.02, std. dev. 11.02); ii) number of features (units across considered layers), which varied between 300 and  
1340 78,400 (mean 20,971.26, std. dev. 18,362.91); and iii) the size of the embedding layer, which varied between 128 and 48,000  
1341 (mean 872.28, std. dev. 744.33). And the remaining two features were binary: iv) uni- vs. bi-directionality (32/43 models were  
1342 bi-directional), and v) the presence of recurrence (5/43 models had recurrence). And we included two training-related  
1343 features: i) training data size (in GB), which varied between 0.2 and 336 (mean 351.06 std. dev. 726.81); and ii) vocabulary  
1344 size, which varied between 30,000 and 3,000,000 (mean 223,096.95 std. dev. 561,737.36). All training data numbers were  
1345 taken from the original model papers, and if training data was specified in tokens, a conversion rate of 4 bytes per token was  
1346 used. We further excluded the multilingual XLM and BERT models when examining the effect of training data size, because  
1347 those numbers could not be confidently verified. For comparison, we also included performance on the next-word-prediction  
1348 task that we examined in the main text.

1349  
1350 The results are shown in Fig. S10. As expected—given the results reported in the main text for the individual datasets (Fig. 3,  
1351 4c)—next-word prediction performance robustly predicts model-to-brain/behavior fit ( $r = 0.49$ ,  $p < 0.01$ ). These results  
1352 suggest that optimizing for predictive representations may be a critical shared feature of biological and artificial neural  
1353 networks for language. How do architectural and training-related features compare to next-word-prediction task  
1354 performance in their effect on neural/behavioral predictivity? Two architectural size features are most correlated with model  
1355 performance: number of hidden layers ( $r = 0.56$ ,  $p < 0.001$ ), and number of features ( $r = 0.68$ ,  $p < 0.0001$ ). This is expected  
1356 given that the most recent models with the highest performance on linguistic tasks are also the largest ones that researchers  
1357 are able to run on modern hardware. The two training-related features—training data size and vocabulary size—are  
1358 significantly *negatively* correlated with model performance. To rule out the possibility that the negative effect of training-  
1359 related features is driven by models with relatively small training datasets and vocabulary size (e.g., ETM; Table S11) that have  
1360 low brain/behavior predictivity, we ran an additional analysis considering only transformer models ( $n=38$ ): even in these  
1361 generally highly predictive models, more training data ( $r = -0.29$ ,  $p = 0.11$  [not plotted]) or larger vocabulary size ( $r = -0.21$ ,  $p$   
1362  $= 0.25$  [not plotted]) do not appear to be beneficial, although the negative correlations are non-significant.

1363  
1364 Does the collection of model designs investigated in this paper inform the hyperparameters that should be optimized for in  
1365 any new model to achieve high predictivity? To provide a preliminary answer to this question, we performed an exploratory  
1366 analysis in the form of stepwise forward model selection and examined (a) the most parsimonious model that explains the  
1367 data, and (b) how much variance the selected features explain cumulatively (Fig. S10b). High overall explained variance  
1368 indicates that the combination of features selected by the model is predictive of model performance, whereas low overall  
1369 explained variance indicates that crucial predictive hyperparameters are still being neglected. In the forward regression  
1370 analysis, we add predictors based on the highest  $R^2$ -adjusted value of the new model, as long as variance increases by adding  
1371 a new factor. This analysis revealed that adding training dataset size and recurrence does not lead to variance increase.  
1372 Significance markers indicate the p-value for significance of adding each term, and for each regression step we plot the added  
1373 explained variance (in  $R^2$ -adjusted) of the variable chosen by the model. The overall cumulative  $R^2$ -adjusted value of the  
1374 selected model is 0.822.



1375

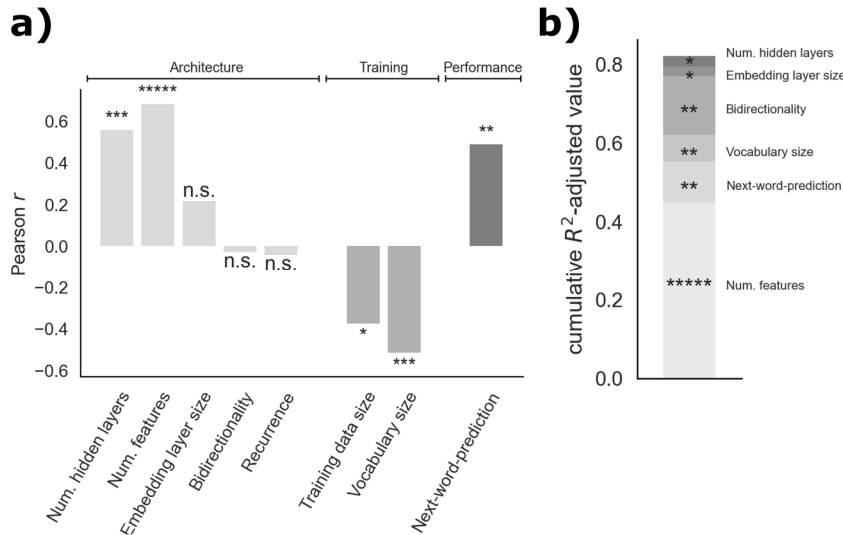

1376 **Figure S10: Effects of model architecture vs. training on neural and behavioral scores. a)** We compared the effects on neural  
 1377 and behavioral scores (the averaged model score across all four datasets) of three kinds of features: (i) architectural  
 1378 properties, (ii) training-dependent variables, and, for comparison, (iii) performance on the next-word-prediction task examined  
 1379 in the main text (Fig. 3, 4c). **b)** Alternative combination of predictors with stepwise forward regression model. New predictors  
 1380 are added based on the highest  $R^2$ -adjusted value of the new model, as long as variance increases by adding a new factor  
 1381 (thus excluding training dataset size and recurrence). Significance markers indicate the p-value for significance of adding  
 1382 model terms. For each regression step, we plot the added explained variance (in  $R^2$ -adjusted) of the variable chosen by the  
 1383 model. The overall cumulative  $R^2$ -adjusted value of the selected model is 0.822. As in a), the preferred explanatory variable is  
 1384 the number of features. Stepwise forward regression based on significance leads to the same model-choice. Note that, as  
 1385 above, t5-11b is excluded for regression based on next-word-prediction, and multilingual models are excluded for regression  
 1386 on training size.

1387

1388

1389

|    | Model identifier                      | Architecture class | Num. layers | Num. features | Embedding layer size | Bidirectional | Recurrent | Training data size | Vocabulary size | Tokenization               | Training tasks                                                                                                                                |
|----|---------------------------------------|--------------------|-------------|---------------|----------------------|---------------|-----------|--------------------|-----------------|----------------------------|-----------------------------------------------------------------------------------------------------------------------------------------------|
| 1  | glove                                 | Embedding          | 1           | 300           | 300                  | 0             | 0         | 3360               | 2200000         | Stanford tokenizer         | Learning word vectors such that their dot product equals the logarithm of the words' probability of co-occurrence                             |
| 2  | ETM                                   | Embedding          | 1           | 300           | 300                  | 0             | 0         | 0.2                | 52258           | Regex word-level tokenizer | Variational inference topic modeling using embedding representations of both words and topics                                                 |
| 3  | word2vec                              | Embedding          | 1           | 300           | 300                  | 0             | 0         | 400                | 3000000         | Word-level tokenizer       | Predicting a center word from the surrounding context                                                                                         |
| 4  | lstm_lm_1b                            | Recurrent          | 2           | 2048          | 1024                 | 0             | 1         | 4                  | 793471          | bbPE                       | Causal Language Modeling                                                                                                                      |
| 5  | skip-thoughts                         | Recurrent          | 1           | 4800          | 4800                 | 0             | 1         | 3                  | 930911          | NLTK tokenizer             | Predicting words in neighboring sentences                                                                                                     |
| 6  | distilbert-base-uncased               | Bidir. transf.     | 6           | 5376          | 768                  | 1             | 0         | 13                 | 30522           | WordPiece                  | Masked Language Modeling<br>Next-Sentence Prediction                                                                                          |
| 7  | bert-base-uncased                     | Bidir. transf.     | 12          | 9984          | 768                  | 1             | 0         | 13                 | 30522           | WordPiece                  |                                                                                                                                               |
| 8  | bert-base-multilingual-cased          | Bidir. transf.     | 12          | 9984          | 768                  | 1             | 0         | n.a.               | 119547          | WordPiece                  |                                                                                                                                               |
| 9  | bert-large-uncased                    | Bidir. transf.     | 24          | 25600         | 1024                 | 1             | 0         | 13                 | 30522           | WordPiece                  |                                                                                                                                               |
| 10 | bert-large-uncased-whole-word-masking | Bidir. transf.     | 24          | 25600         | 1024                 | 1             | 0         | 13                 | 30522           | WordPiece                  |                                                                                                                                               |
| 11 | distilroberta-base                    | Bidir. transf.     | 6           | 5376          | 768                  | 1             | 0         | 161                | 50265           | bbPE                       | dynamic Masked Language Modeling                                                                                                              |
| 12 | roberta-base                          | Bidir. transf.     | 12          | 9984          | 768                  | 1             | 0         | 161                | 50265           | bbPE                       |                                                                                                                                               |
| 13 | roberta-large                         | Bidir. transf.     | 24          | 25600         | 1024                 | 1             | 0         | 161                | 50265           | bbPE                       |                                                                                                                                               |
| 14 | xlm-mlm-enfr-1024                     | Bidir. transf.     | 6           | 7168          | 1024                 | 1             | 0         | n.a.               | 64139           | BPE                        | multilingual Masked Language Modeling                                                                                                         |
| 15 | xlm-mlm-enfr-1024                     | Bidir. transf.     | 6           | 7168          | 1024                 | 1             | 0         | n.a.               | 64139           | BPE                        | multilingual Causal Language Modeling                                                                                                         |
| 16 | xlm-mlm-xnli15-1024                   | Bidir. transf.     | 12          | 13312         | 1024                 | 1             | 0         | n.a.               | 95000           | BPE                        | multilingual Masked Language Modeling                                                                                                         |
| 17 | xlm-mlm-100-1280                      | Bidir. transf.     | 16          | 21760         | 1280                 | 1             | 0         | n.a.               | 200000          | BPE                        |                                                                                                                                               |
| 18 | xlm-mlm-en-2048                       | Bidir. transf.     | 12          | 26624         | 2048                 | 1             | 0         | 16                 | 30145           | BPE                        | Masked Language Modeling                                                                                                                      |
| 19 | xlm-roberta-base                      | Bidir. transf.     | 12          | 9984          | 768                  | 1             | 0         | 2500               | 250002          | SentencePiece              | multilingual Masked Language Modeling                                                                                                         |
| 20 | xlm-roberta-large                     | Bidir. transf.     | 25          | 25600         | 1024                 | 1             | 0         | 2500               | 250002          | SentencePiece              |                                                                                                                                               |
| 21 | transfo-xl-wt103                      | Bidir. transf.     | 18          | 19456         | 1024                 | 1             | 1         | 0.4                | 267735          | Word-level tokenizer       | Causal Language Modeling                                                                                                                      |
| 22 | xlnet-base-cased                      | Bidir. transf.     | 12          | 9984          | 768                  | 1             | 1         | 126                | 32000           | SentencePiece              | Permutation Language Modeling                                                                                                                 |
| 23 | xlnet-large-cased                     | Bidir. transf.     | 24          | 25600         | 1024                 | 1             | 1         | 126                | 32000           | SentencePiece              |                                                                                                                                               |
| 24 | ctrl                                  | Bidir. transf.     | 48          | 62720         | 1280                 | 1             | 0         | 140                | 246534          | BPE                        | Causal Language Modeling                                                                                                                      |
| 25 | t5-small                              | Bidir. transf.     | 6           | 3584          | 512                  | 1             | 0         | 862                | 32128           | SentencePiece              | Text-to-text training on a variety of tasks (i.e., prediction of multiple corrupted tokens, and tasks from the GLUE and SuperGLUE benchmarks) |
| 26 | t5-base                               | Bidir. transf.     | 12          | 9984          | 768                  | 1             | 0         | 862                | 32128           | SentencePiece              |                                                                                                                                               |
| 27 | t5-large                              | Bidir. transf.     | 24          | 25600         | 1024                 | 1             | 0         | 862                | 32128           | SentencePiece              |                                                                                                                                               |
| 28 | t5-3b                                 | Bidir. transf.     | 24          | 25600         | 1024                 | 1             | 0         | 862                | 32128           | SentencePiece              |                                                                                                                                               |
| 29 | t5-11b                                | Bidir. transf.     | 24          | 25600         | 1024                 | 1             | 0         | 862                | 32128           | SentencePiece              |                                                                                                                                               |
| 30 | albert-base-v1                        | Bidir. transf.     | 12          | 9984          | 128                  | 1             | 0         | 16                 | 30000           | SentencePiece              |                                                                                                                                               |
| 31 | albert-base-v2                        | Bidir. transf.     | 12          | 9984          | 128                  | 1             | 0         | 16                 | 30000           | SentencePiece              | Masked Language Modeling<br>Sentence-Order Prediction                                                                                         |
| 32 | albert-large-v1                       | Bidir. transf.     | 24          | 25600         | 128                  | 1             | 0         | 16                 | 30000           | SentencePiece              |                                                                                                                                               |
| 33 | albert-large-v2                       | Bidir. transf.     | 24          | 25600         | 128                  | 1             | 0         | 16                 | 30000           | SentencePiece              |                                                                                                                                               |
| 34 | albert-xlarge-v1                      | Bidir. transf.     | 24          | 51200         | 128                  | 1             | 0         | 16                 | 30000           | SentencePiece              |                                                                                                                                               |
| 35 | albert-xlarge-v2                      | Bidir. transf.     | 24          | 51200         | 128                  | 1             | 0         | 16                 | 30000           | SentencePiece              |                                                                                                                                               |
| 36 | albert-xxlarge-v1                     | Bidir. transf.     | 12          | 53248         | 128                  | 1             | 0         | 16                 | 30000           | SentencePiece              |                                                                                                                                               |
| 37 | albert-xxlarge-v2                     | Bidir. transf.     | 12          | 53248         | 128                  | 1             | 0         | 16                 | 30000           | SentencePiece              |                                                                                                                                               |
| 38 | openai-gpt                            | Unidir. transf.    | 12          | 9984          | 768                  | 0             | 0         | 3                  | 40478           | BPE                        | Causal Language Modeling                                                                                                                      |
| 39 | distilgpt2                            | Unidir. transf.    | 6           | 5376          | 768                  | 0             | 0         | 40                 | 50257           | bbPE                       | Causal Language Modeling                                                                                                                      |
| 40 | gpt2                                  | Unidir. transf.    | 12          | 9984          | 768                  | 0             | 0         | 40                 | 50257           | bbPE                       |                                                                                                                                               |
| 41 | gpt2-medium                           | Unidir. transf.    | 24          | 25600         | 1024                 | 0             | 0         | 40                 | 50257           | bbPE                       |                                                                                                                                               |
| 42 | gpt2-large                            | Unidir. transf.    | 36          | 47360         | 1280                 | 0             | 0         | 40                 | 50257           | bbPE                       |                                                                                                                                               |
| 43 | gpt2-xl                               | Unidir. transf.    | 48          | 78400         | 1600                 | 0             | 0         | 40                 | 50257           | bbPE                       |                                                                                                                                               |

1390 Table S11: Overview of model designs.

1391

1392

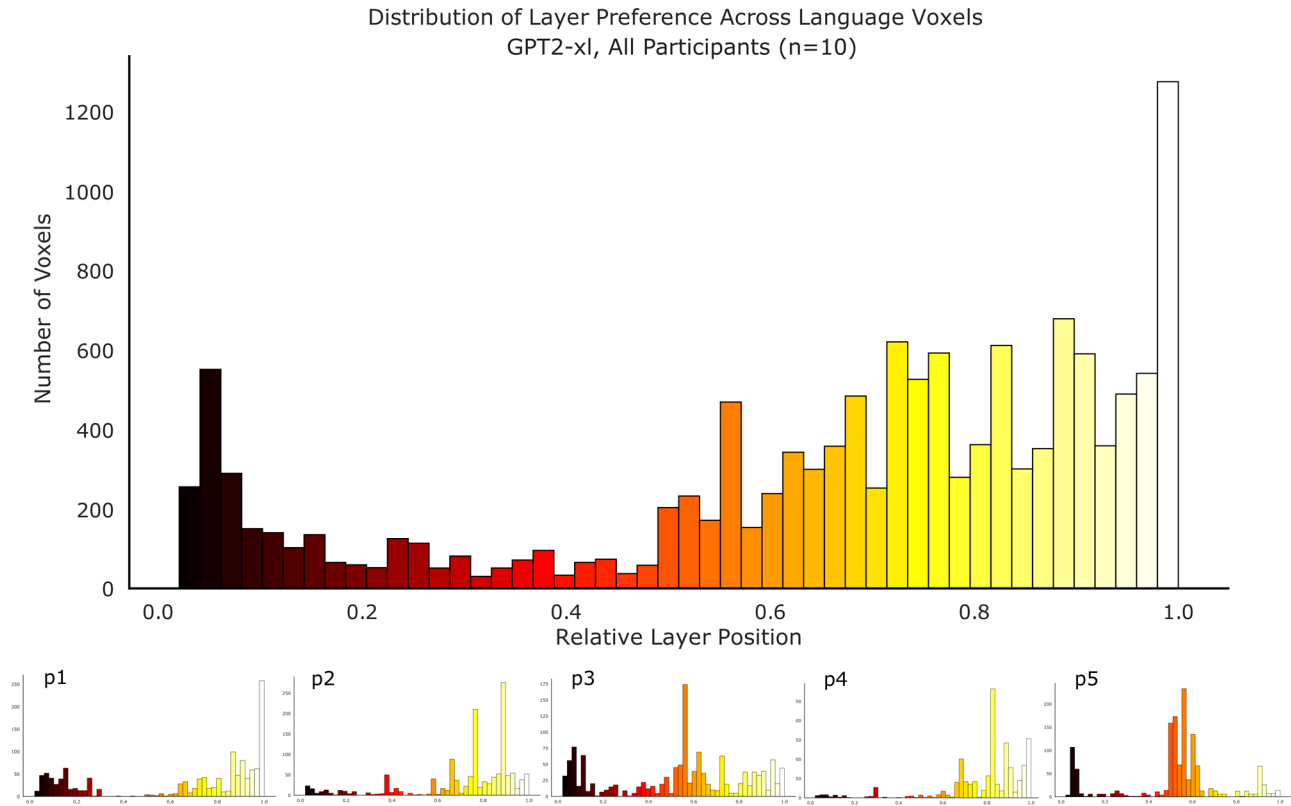

1393 Figure S12: **Distribution of layer preference (best performing layer) per voxel for GPT2-xl for Pereira2018.** A per-voxel per-  
1394 participant raw predictivity value (as opposed to *overall* ceiled predictivity scores in Fig. 2c) was obtained in the language  
1395 network by computing the mean over cross-validation splits and experiments. For each voxel, the layer with the highest  
1396 predictivity value was estimated as the “preferred” layer (argmax over layer scores). As in the main analyses, the voxels in the  
1397 language network were included. Zero on the x-axis corresponds to the embedding layer of the model. The upper plot is  
1398 averaged across all participants in *Pereira2018* (n=10). The lower panel shows the participant-wise layer preference for five  
1399 representative participants. Across participants, most voxels show the highest predictivity value for later layers of GPT2-xl.  
1400 Within participants, the layer preference across voxels varies but is often clustered around particular layers. Investigations of  
1401 how predictivity fluctuates across model layers, and/or between the language network and other parts of the brain, is left for  
1402 future work.

1403

1404

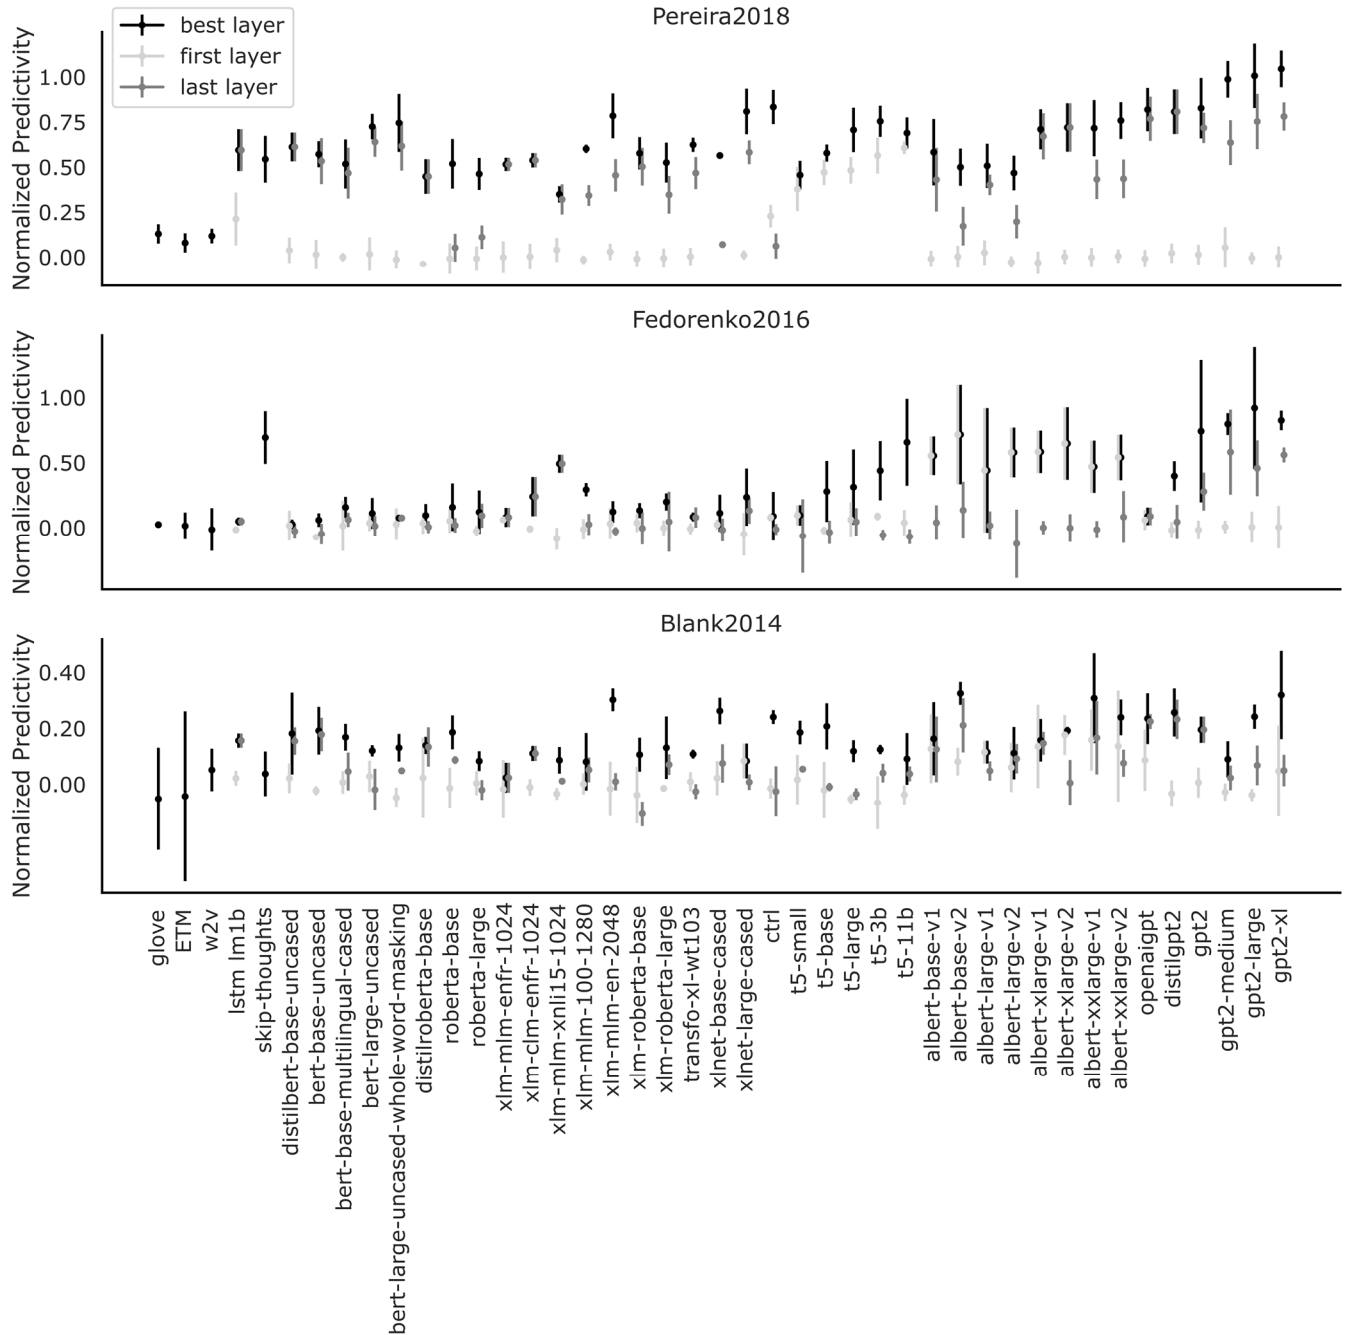

1405

1406

1407

1408

1409

1410

1411

1412

Figure S13: **Brain scores of each model's best, first, and last layer.** To test the importance of intermediate representations, we directly compared layer performances at the beginning and end of each model with the model's best-performing layer. In nearly all networks with multiple layers, both the token embedding (first layer) as well as the task-specific output (last layer) underperform significantly compared to the respective best layer. This suggests that the combination of architecture and weights in the networks is a major driver for brain-like representations, beyond potential semantic information that is already present in the model input codes. Lexical similarity determined by optimizing for next-word prediction present in the output layer is also not sufficient, instead pointing to intermediate representations as the most predictive (see also Fig. 2c).
